# Supplementary material for: Knowledge, attitudes and experiences of self-harm and suicide in low-income and middle-income countries: protocol for a systematic review
Source: PubMed Central journal article supplement (PMC8220466; doi:10.1136/bmjopen-2020-041645), 2021-06-22
Supplement: bmjopen-2020-041645.draft_revisions.pdf [file bmjopen-2020-041645.draft_revisions.pdf]

# BMJ Open

BMJ Open is committed to open peer review. As part of this commitment we make the peer review history of every article we publish publicly available.

When an article is published we post the peer reviewers' comments and the authors' responses online. We also post the versions of the paper that were used during peer review. These are the versions that the peer review comments apply to.

The versions of the paper that follow are the versions that were submitted during the peer review process. They are not the versions of record or the final published versions. They should not be cited or distributed as the published version of this manuscript.

BMJ Open is an open access journal and the full, final, typeset and author-corrected version of record of the manuscript is available on our site with no access controls, subscription charges or pay-per-view fees (<http://bmjopen.bmj.com>).

If you have any questions on BMJ Open's open peer review process please email [info.bmjopen@bmj.com](mailto:info.bmjopen@bmj.com)

# BMJ Open

## Knowledge, attitudes, and experiences of self-harm and suicide in low and middle income countries: protocol for a systematic review

|                               |                                                                                                                                                                                                                                                                                                                                                                                                                                                                                                                                                                                                           |
|-------------------------------|-----------------------------------------------------------------------------------------------------------------------------------------------------------------------------------------------------------------------------------------------------------------------------------------------------------------------------------------------------------------------------------------------------------------------------------------------------------------------------------------------------------------------------------------------------------------------------------------------------------|
| Journal:                      | <i>BMJ Open</i>                                                                                                                                                                                                                                                                                                                                                                                                                                                                                                                                                                                           |
| Manuscript ID                 | bmjopen-2020-041645                                                                                                                                                                                                                                                                                                                                                                                                                                                                                                                                                                                       |
| Article Type:                 | Protocol                                                                                                                                                                                                                                                                                                                                                                                                                                                                                                                                                                                                  |
| Date Submitted by the Author: | 13-Jun-2020                                                                                                                                                                                                                                                                                                                                                                                                                                                                                                                                                                                               |
| Complete List of Authors:     | McPhillips, Rebecca; University of Manchester, Oxford Road, M13 9PL, Social Care and Society<br>Nafees, Sadia; Bangor University, North Wales Centre for Primary Care Research<br>Elahi, Anam ; The University of Manchester, Social Care and Society<br>Batool, Saqba; The University of Manchester, Social Care and Society<br>Krishna, Murali; Foundation for Research and Advocacy in Mental Health (FRAME)<br>Kraye, Anne; Bangor University<br>Huxley, Peter; Bangor University<br>Chaudhry, Nasim ; Pakistan Institute of Living and Learning<br>Robinson, Catherine; The University of Manchester |
| Keywords:                     | Suicide & self-harm < PSYCHIATRY, PUBLIC HEALTH, MENTAL HEALTH                                                                                                                                                                                                                                                                                                                                                                                                                                                                                                                                            |
|                               |                                                                                                                                                                                                                                                                                                                                                                                                                                                                                                                                                                                                           |

SCHOLARONE™  
Manuscripts

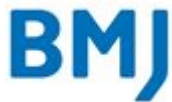

I, the Submitting Author has the right to grant and does grant on behalf of all authors of the Work (as defined in the below author licence), an exclusive licence and/or a non-exclusive licence for contributions from authors who are: i) UK Crown employees; ii) where BMJ has agreed a CC-BY licence shall apply, and/or iii) in accordance with the terms applicable for US Federal Government officers or employees acting as part of their official duties; on a worldwide, perpetual, irrevocable, royalty-free basis to BMJ Publishing Group Ltd ("BMJ") its licensees and where the relevant Journal is co-owned by BMJ to the co-owners of the Journal, to publish the Work in this journal and any other BMJ products and to exploit all rights, as set out in our [licence](#).

The Submitting Author accepts and understands that any supply made under these terms is made by BMJ to the Submitting Author unless you are acting as an employee on behalf of your employer or a postgraduate student of an affiliated institution which is paying any applicable article publishing charge ("APC") for Open Access articles. Where the Submitting Author wishes to make the Work available on an Open Access basis (and intends to pay the relevant APC), the terms of reuse of such Open Access shall be governed by a Creative Commons licence – details of these licences and which [Creative Commons](#) licence will apply to this Work are set out in our licence referred to above.

Other than as permitted in any relevant BMJ Author's Self Archiving Policies, I confirm this Work has not been accepted for publication elsewhere, is not being considered for publication elsewhere and does not duplicate material already published. I confirm all authors consent to publication of this Work and authorise the granting of this licence.

# Knowledge, attitudes, and experiences of self-harm and suicide in low and middle income countries: protocol for a systematic review

Rebecca McPhillips\*<sup>1</sup>

Sadia Nafees<sup>2</sup>

Anam Elahi<sup>1</sup>

Saqba Batool<sup>1</sup>

Murali Krishna<sup>2</sup>

Anne Kraye<sup>2</sup>

Peter Huxley<sup>2</sup>

Nasim Chaudhry<sup>3</sup>,

Catherine Robinson<sup>1</sup>

\*Room C4.5, Ellen Wilkinson Building, Oxford Road, Manchester, M13 9PL.

[Rebecca.mcphillips@manchester.ac.uk](mailto:Rebecca.mcphillips@manchester.ac.uk) +44(0)161 275 5678

<sup>1</sup> Social Care and Society (SCS), Division of Population Health, Health Services Research and Primary Care, School of Health Sciences, Faculty of Biology, Medicine and Health, University of Manchester, Manchester, UK.

<sup>2</sup> Centre For Mental Health And Society, Bangor University, Wales.

<sup>3</sup> Chief Executive Officer, Pakistan Institute of Living and Learning, Karachi, Pakistan

**Word count:** 2,022

## ABSTRACT

**Introduction:** Over 800,000 people die due to suicide each year and suicide presents huge psychological, economic and social burdens for individuals, communities and countries as a whole. Low and middle income countries (LMICs) are disproportionately affected by suicide. The strongest risk factor for suicide is a previous suicide attempt, and other types of self-harm have been found to be robust predictors of suicidal behaviour. An approach that brings together multiple sectors including education, labour, business, law, politics and the media is crucial to tackling suicide and self-harm. The World Health Organization highlights that evaluations of the knowledge and attitudes that priority groups, not only healthcare staff, have of mental health and suicidal behaviour are key to suicide prevention strategies. The aim of this systematic review is to examine the knowledge, attitudes and experiences different stakeholders in LMICs have of self-harm and suicide.

**Methods and analysis:** Medline, Embase, PsycInfo, CINAHL, BNI, Social Sciences and Cochrane library will be searched. Reviewers working independently of each other will screen search results, select studies for inclusion, extract and check extracted data, and rate the quality of the studies using the STROBE and CASP checklists. In anticipation of heterogeneity, a narrative synthesis of quantitative studies will be provided and meta-ethnography will be used to synthesise qualitative studies.

**Ethics and dissemination:** Ethical approval is not required. A report will be provided for the funding body, and the systematic review will be submitted for publication in a high-impact, peer-reviewed, open access journal. Results will also be disseminated at conferences, seminars, congresses and symposia and to relevant stakeholders.

**PROSPERO registration number:** CRD42019135323

### Strengths and limitations of this study

- This systematic review protocol has been written according to the Preferred Reporting Items for Systematic review and Meta-Analysis (PRISMA-P) 2015 checklist.

- The review will conform to the PRISMA statement and to the Cochrane systematic review literature guidelines when results are reported
- A strength of this review is the mixed methods approach, which is particularly suited to the investigation of complex topics
- A limitation of the review is the inclusion of peer reviewed studies only, however language restrictions will not be applied
- The findings from this review will be form a robust basis for the development of a community survey on knowledge and attitudes towards self-harm and suicide in South Asia.

### Keywords

Self-harm; suicide; attitudes; knowledge; experience; quantitative; qualitative; mixed methods, low and middle income countries, LMICs

### INTRODUCTION

The World Health Organization (WHO) estimate that over 800,000 people die due to suicide each year; 1 person every 40 seconds [1]. Suicide disproportionately affects low and middle income countries (LMICs), in 2014 the WHO reported that 75.5% of suicides globally occur in LMICs, and in South East Asia suicide is the leading cause of death in 15-29 year olds [1]. However, the under-reporting and misclassification of suicide as a cause of death in LMICs mean that suicide rates are likely higher than reported [1, 2]. Every suicide death is a tragedy for families, friends and communities and suicide presents huge psychological, economic and social burdens for individuals, communities and countries as a whole [1].

The strongest risk factor for suicide is a previous suicide attempt, and the WHO suggest that for each adult that dies from suicide there may be 20 more suicide attempts [1]. Suicide attempts and suicide are types of self-harm that are distinct from non-suicidal self-injury (NSSI) in terms of intent, however NSSI has also been found to be a robust predictor of suicidal behaviour [3, 4, 5]. A review of

1  
2  
3 the literature on the links between NSSI and suicidal behaviour found that people who engaged in  
4 NSSI were significantly more likely to report suicidal ideation and to have attempted suicide than  
5 those who did not [3]. Furthermore, the link between NSSI and suicidal behaviour remained after  
6 controlling for age, gender, and ethnicity and NSSI was a stronger predictor of suicidal behaviour than  
7 depression, hopelessness, post-traumatic stress, borderline personality disorder, family functioning  
8 and child abuse [3].  
9  
10  
11  
12  
13  
14  
15  
16  
17

18 Suicide and self-harm are the result of complex interactions between genetic, psychological,  
19 biological, cultural, sociodemographic and social factors [1, 6, 7]. Although the healthcare sector  
20 clearly has a vital role to play in tackling suicide and self-harm, an approach that brings together  
21 multiple sectors including education, labour, business, law, politics and the media is crucial [1, 8].  
22  
23  
24  
25  
26  
27

28 The knowledge, attitudes and experiences stakeholders from various sectors have of suicide and self-  
29 harm are likely to influence suicide and self-harm prevention and intervention strategies. A recent  
30 review by the WHO [8] highlights that evaluations of the knowledge and attitudes that priority  
31 groups, for example policy makers and community groups, not only healthcare staff, have of mental  
32 health and suicidal behaviour are key to the collection of high quality surveillance data and prevention  
33 strategies. Reviews to date have focused on the knowledge, attitudes and experiences that healthcare  
34 professionals have towards self-harm and suicide [9, 10, 11, 12]. The aim of this systematic review is  
35 to examine various stakeholders' knowledge, attitudes and experiences of self-harm and suicide. This  
36 systematic review is being undertaken as part of the South Asia Self Harm Initiative (SASHI) project,  
37 which aims to help to find effective responses to self-harm and suicide in South Asia by building  
38 capability and capacity in research infrastructure and expertise in the region. Findings from this  
39 systematic review will be used to inform the development of a survey on knowledge, attitudes and  
40 well-being in South Asia. Thus, we are particularly interested in studies conducted in South Asia and  
41 countries with comparable healthcare systems or cultural backgrounds.  
42  
43  
44  
45  
46  
47  
48  
49  
50  
51  
52  
53  
54  
55  
56  
57  
58  
59  
60

## Research question

1  
2  
3 The SPICE (Setting, Perspective, phenomena of Interest, Comparison, Evaluation) framework was  
4  
5 used to generate the research question that will be addressed by this systematic review [13]:  
6  
7

- 8 • What are stakeholders' knowledge, attitudes and experiences of self-harm and suicide in  
9 LMICs?  
10  
11  
12  
13  
14

## 15 **METHODS AND ANALYSIS**

16  
17 This protocol conforms to the Preferred Reporting Items for Systematic Reviews and Meta-Analyses  
18 Protocols (PRISMA-P) checklist (see Supplementary File 1) [14]. We will conform to the PRISMA  
19 statement and to the Cochrane systematic review literature guidelines when reporting the results [15,  
20 16]. This systematic review has been registered on PROSPERO [17].  
21  
22  
23  
24  
25  
26  
27

### 28 **Search strategy**

29  
30 A Betsi Cadwaladr University Health Board (BCUHB) librarian with expertise in systematic reviews  
31 has assisted the authors in the development of the search strategy (see Appendix 1). We will search  
32 Medline, Embase, PsycInfo, CINAHL, BNI, Social Sciences and Cochrane library. We will not apply  
33 any language restrictions to the search criteria. EndNote and Microsoft Word will be used to manage  
34 initial search results, screening and data throughout the review. We will update the searches prior to  
35 publication to ensure the latest papers are included. Reference lists from included studies and any  
36 identified systematic or literature reviews will also be searched by hand. Study authors will be  
37 contacted in instances when it has not been possible to retrieve full text articles and when clarification  
38 regarding inclusion criteria e.g. participant age, is required.  
39  
40  
41  
42  
43  
44  
45  
46  
47  
48  
49  
50

### 51 **Study selection criteria**

52  
53 Inclusion criteria are empirical studies conducted in LMICs, as defined by the Organisation for  
54 Economic Co-operation and Development [18], irrespective of the study design, whose focus is on the  
55 knowledge, attitudes or experiences of stakeholders towards self-harm and/or suicide, where  
56 participants are aged 16 years and above. Stakeholders are people who have experienced self-harm  
57  
58  
59  
60



1  
2  
3 and/or have attempted suicide themselves, relatives, friends, co-workers, and healthcare workers of  
4 those who have self-harmed, attempted or committed suicide and people in the social, healthcare,  
5 government, and criminal justice sectors. Exclusion criteria are studies conducted in high income  
6 countries (HICs) and studies whose participants are not aged 16 years and above. Studies whose main  
7 focus is on the prevalence and/or predictors of self-harm and/or suicide, relationships between state  
8 and/or trait characteristics and self-harm and/or suicide, euthanasia, terrorism, or epidemiology will  
9 also be excluded. Systematic and literature reviews will be consulted for relevant references but will  
10 not be included in the review. Opinion pieces, editorials, book reviews, and conference and poster  
11 abstracts will not be included in the review.  
12  
13  
14  
15  
16  
17  
18  
19  
20  
21  
22  
23

24 The selection of studies for inclusion will adhere to the Cochrane guidelines and the process of  
25 selection of eligible studies will be illustrated via a PRISMA diagram [16]. Following deduplication  
26 of search results in EndNote, the following screening process will be undertaken in order to select  
27 studies for inclusion in the systematic review:  
28  
29  
30  
31  
32  
33  
34

35 1) Titles and abstracts will be read by two reviewers independently, and relevance and fit with  
36 the inclusion criteria will be assessed. Those of no obvious relevance will be excluded and  
37 any disagreements will be resolved with a third reviewer (and the wider expert group if  
38 necessary).  
39  
40  
41  
42  
43  
44  
45

46 2) Full text articles of remaining studies will be retrieved and read by two reviewers  
47 independently to assess their suitability for inclusion in the final review, disagreements will  
48 be resolved by discussion with a third reviewer (and the wider expert group if necessary).  
49  
50  
51

52 Both reviewers will populate a piloted pro-forma for each full text paper read (see Appendix  
53 2).  
54  
55  
56  
57

## 58 **Data extraction**

59  
60

1  
2  
3 Data will be extracted from selected studies by one reviewer, and a second reviewer will check for  
4 accuracy. Extracted data will be recorded on a piloted pro-forma (see Appendix 2), and will reflect the  
5 inclusion criteria and the designated aims of the review, derived from the article as a whole.  
6  
7

8  
9 Discrepancies will be resolved through discussion (with the wider expert group if necessary).  
10

11 Additional data will be requested from study authors when necessary. Data extraction of qualitative  
12 studies (and for qualitative components in studies with mixed methods) will adhere to the same  
13 methods and will be reviewed independently.  
14  
15  
16  
17  
18  
19

## 20 **Outcomes**

21 Outcomes of interest include:  
22

- 23 • The identification of relevant information on stakeholders' knowledge, attitudes and  
24 experiences of self-harm and suicide, particularly in South Asia and in countries with  
25 comparable healthcare systems and cultural backgrounds  
26  
27
- 28 • The quantitative methods and measures that have been used to investigate stakeholders'  
29 attitudes towards and knowledge about self-harm and suicide and their psychometric  
30 properties  
31  
32
- 33 • The qualitative methods that have been used to investigate stakeholders' attitudes towards,  
34 knowledge about, and experiences of self-harm and suicide.  
35  
36  
37  
38  
39  
40  
41

42 The identified outcomes will inform the development of a survey on knowledge, attitudes and well-  
43 being in South Asia as part of the SASHI project.  
44  
45  
46  
47  
48

## 49 **Quality assessment**

50 All eligible studies will be subject to quality appraisal. The quality of included quantitative studies  
51 will be appraised using the STROBE checklist [19]. The STROBE Statement consists of a checklist of  
52 22 items, which relate to the title, abstract, introduction, methods, results and discussion sections of  
53 articles. Eighteen items are common to cohort studies, case-control studies and cross-sectional studies  
54 and four are specific to each of the three study designs. The quality of included qualitative studies will  
55  
56  
57  
58  
59  
60

1  
2  
3 be appraised using the CASP checklist [20]. The 10-item CASP tool was considered to be the most  
4 suitable tool to consider the quality parameters of qualitative work, and is a well-validated and  
5 accepted tool [15]. Both the STROBE and CASP checklists will be applied independently by two  
6 reviewers and any disagreements will be resolved with a third reviewer (and the wider expert group if  
7 necessary).

8  
9  
10  
11  
12  
13  
14  
15  
16 Studies will not be excluded on the basis of poor quality alone, rather we will discuss the implications  
17 of including studies rated as being of poor quality and place them within context of the wider  
18 literature. This low threshold for inclusion will be applied so that the review can benefit from  
19 researcher insight and theoretical as well as empirical contributions. The relative quality of included  
20 studies will be critically considered during the analysis and in reference to the developed synthesis  
21 and we will attempt to assess the trustworthiness of the evidence in terms of transparency in reporting,  
22 consensus and expertise of the team and relevant stakeholders, and draw on common sense and  
23 expertise as well as evidence.

### 24 25 26 27 28 29 30 31 32 33 34 35 **Descriptive analysis and data synthesis**

36 We anticipate that the quantitative studies included in the review will be heterogenous and this will  
37 prevent meta-analysis. We will provide a narrative synthesis of quantitative studies, structured around  
38 population characteristics and the geographical region of studies. We will provide summaries of the  
39 quantitative methods and measures used to investigate stakeholders' attitudes towards and knowledge  
40 about self-harm and suicide and their psychometric properties.

41  
42  
43  
44  
45  
46  
47  
48  
49  
50  
51  
52  
53  
54  
55  
56  
57  
58  
59  
60  
Meta-ethnography will be used to synthesise qualitative studies [21]. Initially reciprocal translation  
will be performed by comparing the concepts presented in different studies. A chronological approach  
will be taken to reciprocal translation; studies will be arranged chronologically, concepts from papers  
one and two will be compared, and the synthesis of papers one and two will then be compared with  
paper three, and so forth, as is described elsewhere [22]. When contradictions between studies are  
identified, we will perform refutational synthesis by exploring and explaining these. A 'lines-of-

1  
2  
3 argument' synthesis, that links and explains concepts presented by different studies, will be conducted  
4  
5 so that an interpretation of all included studies can be presented.  
6  
7  
8

9 Two reviewers will lead data synthesis. Emergent analysis, and any discrepancies, will be discussed  
10  
11 with other members of the review team. Microsoft Office software will be used to facilitate data  
12  
13 synthesis.  
14  
15  
16

### 17 **Patient and public involvement**

18  
19 No patients or members of the public were involved in the design of this study.  
20  
21  
22

### 23 **Amendments**

24  
25 An amendment has been made to the initial registration of this systematic review in PROSPERO,  
26  
27 which details that only studies from LMICs will be included in this review, and studies from HICs  
28  
29 will be excluded from this review. Any further amendments to this protocol will be documented in the  
30  
31 full review.  
32  
33  
34  
35  
36

### 37 **ETHICS AND DISSEMINATION**

38  
39 Ethics approval is not required as this is a protocol for the systematic review of previously published  
40  
41 data. In addition to a report to the funding body, we intend to submit the systematic review for  
42  
43 publication in a high-impact, peer-reviewed journal. We will select an open access journal to ensure  
44  
45 free access to undergraduate and graduate students, researchers, academics and research groups.  
46

47 Results will also be disseminated at conferences seminars, congresses and symposia and to relevant  
48  
49 stakeholders.  
50  
51

52  
53 **Acknowledgements:** The authors would like to thank Mrs Nia Morris (NM) from BCUHB library for  
54  
55 her contribution to the development of the search strategy.  
56  
57  
58  
59  
60

1  
2  
3 **Contributions:** CR, RM, PH, AK, MK conceived the research idea. SN led the development of the  
4 search strategy, with input from NM, RM, AK, PH. RM, SN, MK, AK, PH, CR conceived the  
5 manuscript. RM lead the drafting of the manuscript with contributions from SN, AE, SB, MK, AK,  
6 PH, NC, CR. All authors approved the final manuscript.  
7  
8  
9  
10

11  
12  
13 **Funding:** This manuscript was funded by UK Research and Innovation Global Challenge Research  
14 Fund (ref: MR/P028144/1). The funder did not have any role in developing this protocol.  
15  
16  
17

18  
19  
20 **Competing interests:** None declared  
21  
22

## 23 24 **References**

- 25  
26 [1] World Health Organization. Preventing suicide: a global imperative. World Health Organization,  
27 2014. Available:  
28 [https://apps.who.int/iris/bitstream/handle/10665/131056/9789241564779\\_eng.pdf;jsessionid=  
29 \[F6255CAAD6496DA078DE41FAB0C5CCBF?sequence=1\]\(https://apps.who.int/iris/bitstream/handle/10665/131056/9789241564779\_eng.pdf;jsessionid=F6255CAAD6496DA078DE41FAB0C5CCBF?sequence=1\) . \[Accessed 04 May 2020\].  
30  
31  
32  
33  
34  
35  
36 \[2\] Jordans MJD, Kaufman A, Brenman NF, \*et al.\* Suicide in South Asia: a scoping review. \*BMC\*  
37 \*Psychiatry\* 2014;\*\*14\*\*:358.doi:10.1186/s12888-014-0358-9 pmid:  
38 <https://www.ncbi.nlm.nih.gov/pubmed/25539951>  
39  
40  
41  
42  
43  
44 \[3\] Hamza CA, Stewart SL, Willoughby T. Examining the link between nonsuicidal self-injury and  
45 suicidal behaviour: a review of the literature and integrated model. \*Clin Psychol Rev\* 2012;\*\*6\*\*  
46 482-95.doi:10.1016/j.cpr.2012.05.003. pmid:  
47 <https://www.ncbi.nlm.nih.gov/pubmed/22717336>  
48  
49  
50  
51  
52  
53  
54 \[4\] Nock MK. Self-injury. \*Annu Rev Clin Psychol\* 2010;\*\*6\*\*:339-63. doi:  
55 \[10.1146/annurev.clinpsy.121208.131258\]\(https://www.ncbi.nlm.nih.gov/pubmed/20192787\) pmid:  
56 <https://www.ncbi.nlm.nih.gov/pubmed/20192787>  
57  
58  
59  
60](https://apps.who.int/iris/bitstream/handle/10665/131056/9789241564779_eng.pdf;jsessionid=F6255CAAD6496DA078DE41FAB0C5CCBF?sequence=1)

- 1  
2  
3  
4  
5 [5] Owens D, Horrocks J, House A. Fatal and non-fatal repetition of self-harm: systematic review. *Br*  
6  
7 *J Psychiatry* 2002;**181**:193-99. doi: 10.1192/bjp.181.3.193 pmid:  
8  
9 <https://www.ncbi.nlm.nih.gov/pubmed/12204922>  
10  
11  
12  
13  
14 [6] Hawton K, Sanders KEA, O'Connor RC. Self-harm and suicide in adolescents. *Lancet*  
15  
16 2012;**379**:2373-82. doi: 10.1016/S0140-6736(12)60322-5 pmid:  
17  
18 <https://www.ncbi.nlm.nih.gov/pubmed/22726518>  
19  
20  
21  
22 [7] Yip PSF, Caine E, Yousef S, *et al.* Means restriction for suicide prevention. *Lancet*  
23  
24 2012;**379**:2393-2399. doi: 10.1016/S0140-6736(12)60521-2  
25  
26  
27  
28  
29 [8] World Health Organization. National suicide prevention strategies: progress, examples and  
30  
31 indicators. World Health Organization, 2018. Available:  
32  
33 <https://apps.who.int/iris/bitstream/handle/10665/279765/9789241515016-eng.pdf?ua=1> .  
34  
35 [accessed 04 May 2020].  
36  
37  
38  
39 [9] Karman P, Kool N, Poslawsky IE, *et al.* Nurses' attitudes towards self-harm: a literature review. *J*  
40  
41 *Psychiatr Ment Health Nurs* 2015;**22**:65-75. doi: 10.1111/jpm.12171 pmid:  
42  
43 <https://www.ncbi.nlm.nih.gov/pubmed/25490929>  
44  
45  
46  
47 [10] O'Connor S, Glover L. Hospital staff experiences of their relationships with adults who self-  
48  
49 harm: a meta-synthesis. *Psychol Psychother* 2017;**90**:480-501. doi: 10.1111/papt.12113.  
50  
51 pmid: <https://www.ncbi.nlm.nih.gov/pubmed/28035740>  
52  
53  
54  
55  
56 [11] Rees N, Rapport F, Thomas G, *et al.* Perceptions of paramedic and emergency care workers of  
57  
58 those who self-harm: a systematic review of the quantitative literature. *J Psychosom Res*  
59  
60

2014;77;449-456. doi: 10.1016/j.jpsychores.2014.09.006. pmid:

<https://www.ncbi.nlm.nih.gov/pubmed/25263398>

[12] Saunders KEA, Hawton K, Fortune S, *et al.* Attitudes and knowledge of clinical staff regarding people who self-harm: a systematic review. *J Affect Disord* 2012;**139**:205-216. doi:

10.1016/j.jad.2011.08.024 pmid: <https://www.ncbi.nlm.nih.gov/pubmed/21925740>

[13] Booth A. Clear and present questions: formulating questions for evidence based practice. *Library*

*Hi Tech* 2006;**24**:355-368. doi: 10.1108/07378830610692127

[14] Shamseer L, Moher D, Clarke M, *et al.* Preferred reporting items for systematic review and meta-analysis protocols (PRISMA-P) 2015: elaboration and explanation. *BMJ* 2015;**350**:g7647.

doi: 10.1136/bmj.g7647 pmid: <https://www.ncbi.nlm.nih.gov/pubmed/25555855>

[15] Higgins JPT, Green S (editors). Cochrane handbook for systematic reviews of interventions

Version 6. The Cochrane Collaboration, 2019. Available: <http://handbook.cochrane.org>.

[Accessed 04 May 2020].

[16] Liberati A, Altman DG, Tetzlaff J, *et al.* The PRISMA statement for reporting systematic

reviews and meta-analyses of studies that evaluate healthcare interventions: explanation and

elaboration. *BMJ* 2009;**339**:b2700. doi: 10.1136/bmj.b2700 pmid:

<https://www.ncbi.nlm.nih.gov/pubmed/19622552>

[17] McPhillips R, Nafees S, Krishna M, *et al.* Knowledge, attitudes, and experiences of self-harm and suicide in low and middle income countries: a systematic review. PROSPERO 2019

CRD42019135323. Available:

[https://www.crd.york.ac.uk/prospere/display\\_record.php?ID=CRD42019135323](https://www.crd.york.ac.uk/prospere/display_record.php?ID=CRD42019135323) [Accessed

04 May 2020]

- 1  
2  
3  
4  
5 [18] Organisation for Economic Co-operation and Development. DAC List of ODA recipients for  
6 reporting on aid in 2018 and 2019. Organisation for Economic Co-operation and  
7 Development, 2019. Available: [http://www.oecd.org/dac/financing-sustainable-](http://www.oecd.org/dac/financing-sustainable-development/development-finance-standards/daclist.htm)  
8 [development/development-finance-standards/daclist.htm](http://www.oecd.org/dac/financing-sustainable-development/development-finance-standards/daclist.htm) [Accessed 04 May 2020]  
9  
10  
11  
12  
13  
14  
15  
16 [19] von Elm E, Altman DG, Egger M, *et al.* STROBE Initiative. The strengthening the reporting in  
17 observational studies in epidemiology (STROBE) statement guidelines for reporting  
18 observational studies. *Lancet* 2007;**370**:1453-57 doi: 0.1016/S0140-6736(07)61602-X pmid:  
19 <https://www.ncbi.nlm.nih.gov/pubmed/18064739>  
20  
21  
22  
23  
24  
25  
26 [20] Critical Appraisal Skills Programme. CASP qualitative checklist. Critical Appraisal Skills  
27 Programme , 2018. Available: [https://casp-uk.net/wp-content/uploads/2018/01/CASP-](https://casp-uk.net/wp-content/uploads/2018/01/CASP-Qualitative-Checklist-2018.pdf)  
28 [Qualitative-Checklist-2018.pdf](https://casp-uk.net/wp-content/uploads/2018/01/CASP-Qualitative-Checklist-2018.pdf)  
29  
30  
31 [Accessed: 04 May 2020]  
32  
33  
34  
35  
36  
37 [21] Noblit GW, Hare RD. *Meta-ethnography: synthesising qualitative studies.* Sage Publications.  
38  
39  
40  
41 [22] Atkins S, Lewin S, Smith H *et al.* Conducting a meta-ethnography of qualitative literature:  
42 lessons learnt. *BMC Med Res Methodol* 2008;**8**:21. doi: 10.1186/1471-2288-8-21 pmid:  
43 <https://www.ncbi.nlm.nih.gov/pubmed/18416812>  
44  
45  
46  
47  
48  
49  
50  
51  
52  
53  
54  
55  
56  
57  
58  
59  
60



1  
2  
3  
4  
5  
6  
7  
8  
9  
10  
11  
12  
13  
14  
15  
16  
17  
18  
19  
20  
21  
22  
23  
24  
25  
26  
27  
28  
29  
30  
31  
32  
33  
34  
35  
36  
37  
38  
39  
40  
41  
42  
43  
44  
45  
46  
47  
48  
49  
50  
51  
52  
53  
54  
55  
56  
57  
58  
59  
60

For peer review only

1  
2  
3  
4  
5  
6  
7  
8  
9  
10  
11  
12  
13  
14  
15  
16  
17  
18  
19  
20  
21  
22  
23  
24  
25  
26  
27  
28  
29  
30  
31  
32  
33  
34  
35  
36  
37  
38  
39  
40  
41  
42  
43  
44  
45  
46  
47  
48  
49  
50  
51  
52  
53  
54  
55  
56  
57  
58  
59  
60

For peer review only

**Supplementary file 1: PRISMA-P (Preferred Reporting Items for Systematic review and Meta-Analysis Protocols) 2015 checklist: recommended items to address in a systematic review protocol\***

| Section and topic                 | Item No | Checklist item                                                                                                                                                                                  | Complete |
|-----------------------------------|---------|-------------------------------------------------------------------------------------------------------------------------------------------------------------------------------------------------|----------|
| <b>ADMINISTRATIVE INFORMATION</b> |         |                                                                                                                                                                                                 |          |
| Title:                            |         |                                                                                                                                                                                                 |          |
| Identification                    | 1a      | Identify the report as a protocol of a systematic review                                                                                                                                        | X        |
| Update                            | 1b      | If the protocol is for an update of a previous systematic review, identify as such                                                                                                              | N/A      |
| Registration                      | 2       | If registered, provide the name of the registry (such as PROSPERO) and registration number                                                                                                      | X        |
| Authors:                          |         |                                                                                                                                                                                                 |          |
| Contact                           | 3a      | Provide name, institutional affiliation, e-mail address of all protocol authors; provide physical mailing address of corresponding author                                                       | X        |
| Contributions                     | 3b      | Describe contributions of protocol authors and identify the guarantor of the review                                                                                                             | X        |
| Amendments                        | 4       | If the protocol represents an amendment of a previously completed or published protocol, identify as such and list changes; otherwise, state plan for documenting important protocol amendments | X        |
| Support:                          |         |                                                                                                                                                                                                 |          |
| Sources                           | 5a      | Indicate sources of financial or other support for the review                                                                                                                                   | X        |
| Sponsor                           | 5b      | Provide name for the review funder and/or sponsor                                                                                                                                               | X        |
| Role of sponsor or funder         | 5c      | Describe roles of funder(s), sponsor(s), and/or institution(s), if any, in developing the protocol                                                                                              | X        |
| <b>INTRODUCTION</b>               |         |                                                                                                                                                                                                 |          |
| Rationale                         | 6       | Describe the rationale for the review in the context of what is already known                                                                                                                   | X        |
| Objectives                        | 7       | Provide an explicit statement of the question(s) the review will address with reference to participants, interventions, comparators, and outcomes (PICO)                                        | X        |
| <b>METHODS</b>                    |         |                                                                                                                                                                                                 |          |
| Eligibility criteria              | 8       | Specify the study characteristics (such as PICO, study design, setting, time frame) and report characteristics (such as years considered, language, publication                                 | X        |

|                                    |     |                                                                                                                                                                                                                                                  |     |
|------------------------------------|-----|--------------------------------------------------------------------------------------------------------------------------------------------------------------------------------------------------------------------------------------------------|-----|
|                                    |     | status) to be used as criteria for eligibility for the review                                                                                                                                                                                    |     |
| Information sources                | 9   | Describe all intended information sources (such as electronic databases, contact with study authors, trial registers or other grey literature sources) with planned dates of coverage                                                            | X   |
| Search strategy                    | 10  | Present draft of search strategy to be used for at least one electronic database, including planned limits, such that it could be repeated                                                                                                       | X   |
| Study records:                     |     |                                                                                                                                                                                                                                                  |     |
| Data management                    | 11a | Describe the mechanism(s) that will be used to manage records and data throughout the review                                                                                                                                                     | X   |
| Selection process                  | 11b | State the process that will be used for selecting studies (such as two independent reviewers) through each phase of the review (that is, screening, eligibility and inclusion in meta-analysis)                                                  | X   |
| Data collection process            | 11c | Describe planned method of extracting data from reports (such as piloting forms, done independently, in duplicate), any processes for obtaining and confirming data from investigator                                                            | X   |
| Data items                         | 12  | List and define all variables for which data will be sought (such as PICO items, funding sources), any pre-planned data assumptions and simplifications                                                                                          | X   |
| Outcomes and prioritization        | 13  | List and define all outcomes for which data will be sought, including prioritization of main and additional outcomes, with rationale                                                                                                             | X   |
| Risk of bias in individual studies | 14  | Describe anticipated methods for assessing risk of bias of individual studies, including whether this will be done at the outcome or study level, or both; state how this information will be used in data synthesis                             | X   |
| Data synthesis                     | 15a | Describe criteria under which study data will be quantitatively synthesised                                                                                                                                                                      | X   |
|                                    | 15b | If data are appropriate for quantitative synthesis, describe planned summary measures, methods of handling data and methods of combining data from studies, including any planned exploration of consistency (such as $I^2$ , Kendall's $\tau$ ) | N/A |
|                                    | 15c | Describe any proposed additional analyses (such as sensitivity or subgroup analyses, meta-regression)                                                                                                                                            | X   |
|                                    | 15d | If quantitative synthesis is not appropriate, describe the type of summary planned                                                                                                                                                               | X   |
| Meta-bias(es)                      | 16  | Specify any planned assessment of meta-bias(es) (such as publication bias across studies, selective reporting within studies)                                                                                                                    | N/A |
| Confidence in cumulative evidence  | 17  | Describe how the strength of the body of evidence will be assessed (such as GRADE)                                                                                                                                                               | N/A |

1  
2  
3  
4  
5  
6  
7  
8  
9  
10  
11  
12  
13  
14  
15  
16  
17  
18  
19  
20  
21  
22  
23  
24  
25  
26  
27  
28  
29  
30  
31  
32  
33  
34  
35  
36  
37  
38  
39  
40  
41  
42  
43  
44  
45  
46

**\* It is strongly recommended that this checklist be read in conjunction with the PRISMA-P Explanation and Elaboration (cite when available) for important clarification on the items. Amendments to a review protocol should be tracked and dated. The copyright for PRISMA-P (including checklist) is held by the PRISMA-P Group and is distributed under a Creative Commons Attribution Licence 4.0.**

*From: Shamseer L, Moher D, Clarke M, Ghersi D, Liberati A, Petticrew M, Shekelle P, Stewart L, PRISMA-P Group. Preferred reporting items for systematic review and meta-analysis protocols (PRISMA-P) 2015: elaboration and explanation. BMJ. 2015 Jan 2;349(jan02 1):g7647.*

For peer review only

**Appendix 1: Knowledge, attitudes, and experiences of self-harm and suicide in low and middle income countries: Medline search strategy**

**Self-harm and suicide terms**

- 1 Suicide/
- 2 Suicide.mp
- 3 Suicide, Attempted/
- 4 Suicide, Attempted.mp
- 5 Self-Injurious Behavior/
- 6 Self-Injurious Behavior.mp
- 7 Self-Mutilation/
- 8 Self-Mutilation.mp
- 9 Suicidal Ideation/
- 10 Suicidal Ideation.mp
- 11 Attempted Suicide/
- 12 Attempted Suicide.mp
- 13 Drug Overdose/
- 14 Drug Overdose.mp
- 15 ((Self adj2 cut\$) or (para adj suicid\$) or (attempt\$ adj suicide\$) or (suicid\$ adj behavio\$)).mp.
- 16 (auto?mutilat\$ or cutt\$ or over?dos\$ or self?destruct\$ or self?harm\$ or self?immolat\$ or self?inflict\$ or self?injur\$ or self?mutilat\$ or self?poison\$ or suicide\$ or self?burn\$).mp.
- 17 Or/1-16

**Stakeholder terms**

- 18 exp Health Personnel/
- 19 Health Personnel.mp
- 20 exp PHYSICIANS/
- 21 PHYSICIANS.mp
- 22 exp Personnel, Hospital/
- 23 Personnel, Hospital.mp
- 24 Social Workers/
- 25 Social Workers.mp
- 26 ((doctor\$ or physician\$ or hosp\$ or medic\$ or health?care or social or wel?fare) adj (profession\$ or staff\$ or officer\$ or person\$ or worker\$)).mp
- 27 Family/
- 28 Famil\$.mp
- 29 Friends/
- 30 Friend\$.mp
- 31 Caregivers/
- 32 Caregiver\$.mp
- 33 Criminals/
- 34 Criminal\$.mp
- 35 Prisoners/
- 36 Prison\$.mp
- 37 Social Justice/
- 38 Soci\$ adj Just\$.mp
- 39 (partner\$ or parent\$ or grandparent\$ or children or sibling\$ or famil\$ or friend\$ or relative\$).mp.
- 40 (communit\$ or societ\$ or government\$).mp.
- 41 (criminal\$ or offender\$ or prisoner\$ or in?mate\$).mp.
- 42 (justice adj system\$).mp.

1  
2  
3 **43** or/18-42

4 **Knowledge and attitude terms**

5 **44** Attitude/

6 **45** Attitude of Health Personnel/

7 **46** Attitude to Death/

8 **47** Knowledge/

9 **48** Health Knowledge, Attitudes, Practice/

10 **49** Awareness/

11 **50** Education/

12 **51** Health Education/

13 **52** ((train\$ or trainer\$ or experienc\$ or perspectiv\$ or knowledg\$ or attitud\$ or awaren\$ or  
14 educat\$) adj health).mp.

15 **53** social behavior/ or help-seeking behavior/ or self-control/ or shyness/ or social  
16 adjustment/ or social isolation/ or social marginalization/ or social skills/ or social  
17 stigma/ or social exclusion/ or social inclusion

18 **54** Prejudice/

19 **55** Taboo/

20 **56** exp Shame/

21 **57** (tabo\$ or sham\$ or stigma\$ or prejudice\$ or help?seek\$ behavior\$ or self?control\$ or  
22 shy\$ or (social adj adjust\$ or behavio\$ or isolate\$ or margin\$ or Stigm\$ or skil\$)).mp

23 **58** or/44-57

24 **LMIC terms**

25 **59** Developing Countries/

26 **60** "low and middle income countr\$".ab,ti.

27 **61** LMIC.mp.

28 **62** india/ or sikkim/ or pakistan/

29 **63** exp Asia/

30 **64** or/59-63

31 **Self-harm and suicide, stakeholders, knowledge and attitude and LMIC combined (with  
32 limits)**

33 **65** 17 and 43 and 58 and 64

34 **66** limit 65 to humans

35 **67** limit 66 (adolescent <13 to 17 years> or adult <18 to 64 years> or aged <65+ years>)  
36 (aged or "aged, 80 and over" or "frail elderly" or "middle aged" or "young adult" or  
37 adults or "teenager" or adolescent).mp

## Appendix 2: Knowledge, attitudes, and experiences of self-harm and suicide in low and middle income countries systematic review: data extraction form

### Notes for reviewers

Record any missing information as unclear or not described to ensure it is clear that the information was not found in the paper, not that you forgot to extract it

| General information                                                                                                              |                                                                                                                                                                                                                                                                                                                                                                                                                                                                                                                                                                                                                                                                                                                                                 |                          |
|----------------------------------------------------------------------------------------------------------------------------------|-------------------------------------------------------------------------------------------------------------------------------------------------------------------------------------------------------------------------------------------------------------------------------------------------------------------------------------------------------------------------------------------------------------------------------------------------------------------------------------------------------------------------------------------------------------------------------------------------------------------------------------------------------------------------------------------------------------------------------------------------|--------------------------|
| Date form completed                                                                                                              |                                                                                                                                                                                                                                                                                                                                                                                                                                                                                                                                                                                                                                                                                                                                                 |                          |
| Reviewer extracting data                                                                                                         |                                                                                                                                                                                                                                                                                                                                                                                                                                                                                                                                                                                                                                                                                                                                                 |                          |
| Study title                                                                                                                      |                                                                                                                                                                                                                                                                                                                                                                                                                                                                                                                                                                                                                                                                                                                                                 |                          |
| Study authors                                                                                                                    |                                                                                                                                                                                                                                                                                                                                                                                                                                                                                                                                                                                                                                                                                                                                                 |                          |
| Journal                                                                                                                          |                                                                                                                                                                                                                                                                                                                                                                                                                                                                                                                                                                                                                                                                                                                                                 |                          |
| Year of publication                                                                                                              |                                                                                                                                                                                                                                                                                                                                                                                                                                                                                                                                                                                                                                                                                                                                                 |                          |
| Study author contact details                                                                                                     |                                                                                                                                                                                                                                                                                                                                                                                                                                                                                                                                                                                                                                                                                                                                                 |                          |
| Notes                                                                                                                            |                                                                                                                                                                                                                                                                                                                                                                                                                                                                                                                                                                                                                                                                                                                                                 |                          |
| Study eligibility for inclusion in review                                                                                        |                                                                                                                                                                                                                                                                                                                                                                                                                                                                                                                                                                                                                                                                                                                                                 |                          |
| Main focus on stakeholders' knowledge, attitudes and experiences of self-harm and/or suicide (excluding euthanasia or terrorism) | Yes/No                                                                                                                                                                                                                                                                                                                                                                                                                                                                                                                                                                                                                                                                                                                                          | Location in text (pg. #) |
| Study population aged 16 and above (or can data from those aged 16 and above only can be extracted?)                             | Yes/No                                                                                                                                                                                                                                                                                                                                                                                                                                                                                                                                                                                                                                                                                                                                          | Location in text (pg. #) |
| Low-middle income country                                                                                                        | Yes/No                                                                                                                                                                                                                                                                                                                                                                                                                                                                                                                                                                                                                                                                                                                                          | Location in text (pg. #) |
| Include or exclude                                                                                                               | Include/Exclude                                                                                                                                                                                                                                                                                                                                                                                                                                                                                                                                                                                                                                                                                                                                 |                          |
| Reason for exclusion                                                                                                             | Reasons for exclusion<br>1) Knowledge, attitudes and experience of self-harm/suicide not main concern of study (including terrorism and euthanasia) include main phenomenon being studied in notes – to be reviewed after 25 studies<br>1a) Completely irrelevant topic e.g. paper on depression, no mention of self-harm/suicide 1b) Focus on prevalence of suicide/self-harm<br>1c) Focus on risk factors of suicide/self-harm<br>1d) Focus on intervention only<br>1e) Mention of self-harm/suicide however topic not relevant to attitudes, knowledge and experiences of self-harm/suicide<br>2) Research not conducted in LMICs<br>3) Research population not 16 and over<br>4) Literature review<br>5) Commentary, book review, editorial |                          |
| Notes                                                                                                                            |                                                                                                                                                                                                                                                                                                                                                                                                                                                                                                                                                                                                                                                                                                                                                 |                          |
| Characteristics of included studies: Participants                                                                                |                                                                                                                                                                                                                                                                                                                                                                                                                                                                                                                                                                                                                                                                                                                                                 |                          |



|                                                                                                                                                                    |                                |                                 |
|--------------------------------------------------------------------------------------------------------------------------------------------------------------------|--------------------------------|---------------------------------|
|                                                                                                                                                                    | Description as stated in paper | <i>Location in text (pg. #)</i> |
| Study location (Country and state/city/area) e.g. India, Bangalore                                                                                                 |                                |                                 |
| Study setting e.g. hospital, community                                                                                                                             |                                |                                 |
| Study population e.g. nurses, community members                                                                                                                    |                                |                                 |
| Informed consent obtained                                                                                                                                          | <i>Yes, No, Unclear</i>        |                                 |
| Total number of participants                                                                                                                                       |                                |                                 |
| Exclusions and withdrawals                                                                                                                                         |                                |                                 |
| Participant demographics e.g.<br>Age<br>Sex<br>Race/Ethnicity<br>Religious beliefs<br>Mental illness diagnosis<br>Physical illness diagnosis<br>Other demographics |                                |                                 |
| Notes                                                                                                                                                              |                                |                                 |
| <b>Characteristics of included studies: Methods</b>                                                                                                                |                                |                                 |
|                                                                                                                                                                    | Description as stated in paper | <i>Location in text (pg. #)</i> |
| Aim of study/Research question(s) (implicit or explicit in text?)                                                                                                  |                                |                                 |
| Study methodology (or methodologies)                                                                                                                               |                                |                                 |
| Quantitative measures used e.g. Acceptability of Suicide Scale and information on whether measure is validated (if applicable)                                     |                                |                                 |
| Quantitative analysis methods and procedure                                                                                                                        |                                |                                 |
| Qualitative methods used e.g. focus group, one-to-one interviews, vignettes (if applicable)                                                                        |                                |                                 |
| Theoretical/epistemological perspectives underpinning qualitative research (explicit or reviewer's interpretation)                                                 |                                |                                 |
| Qualitative data analysis methods and procedure                                                                                                                    |                                |                                 |
| Start date and end date                                                                                                                                            |                                |                                 |
| Notes                                                                                                                                                              |                                |                                 |
| <b>Characteristics of included studies: Results</b>                                                                                                                |                                |                                 |
|                                                                                                                                                                    | Description as stated in paper | <i>Location in text (pg. #)</i> |
| Qualitative results – direct quotes from participants (first order)                                                                                                |                                |                                 |
| Qualitative results – study                                                                                                                                        |                                |                                 |

|                                                                                                |                                |                                 |
|------------------------------------------------------------------------------------------------|--------------------------------|---------------------------------|
| author's interpretations of data<br>(second order)                                             |                                |                                 |
| Quantitative results                                                                           |                                |                                 |
| Indicators of acceptability to users<br>(if applicable)                                        |                                |                                 |
| Suggested mechanisms of<br>intervention action (if applicable)                                 |                                |                                 |
| <b>Characteristics of included studies: Other information</b>                                  |                                |                                 |
|                                                                                                | Description as stated in paper | <i>Location in text (pg. #)</i> |
| Key conclusions of authors                                                                     |                                |                                 |
| References to other relevant<br>studies                                                        |                                |                                 |
| Correspondence required by<br>reviewers for further information<br>(who, when, what requested) |                                |                                 |
| Notes                                                                                          |                                |                                 |

# BMJ Open

## Knowledge, attitudes, and experiences of self-harm and suicide in low and middle income countries: protocol for a systematic review

|                                 |                                                                                                                                                                                                                                                                                                                                                                                                                                                                              |
|---------------------------------|------------------------------------------------------------------------------------------------------------------------------------------------------------------------------------------------------------------------------------------------------------------------------------------------------------------------------------------------------------------------------------------------------------------------------------------------------------------------------|
| Journal:                        | <i>BMJ Open</i>                                                                                                                                                                                                                                                                                                                                                                                                                                                              |
| Manuscript ID                   | bmjopen-2020-041645.R1                                                                                                                                                                                                                                                                                                                                                                                                                                                       |
| Article Type:                   | Protocol                                                                                                                                                                                                                                                                                                                                                                                                                                                                     |
| Date Submitted by the Author:   | 09-Jan-2021                                                                                                                                                                                                                                                                                                                                                                                                                                                                  |
| Complete List of Authors:       | McPhillips, Rebecca; The University of Manchester, Social Care and Society<br>Nafees, Sadia; Bangor University, North Wales Centre for Primary Care Research<br>Elahi, Anam ; The University of Manchester, Social Care and Society<br>Batool, Saqba; The University of Manchester, Social Care and Society<br>Krishna, Murali; Bangor University<br>Kraye, Anne; Bangor University<br>Huxley, Peter; Bangor University<br>Robinson, Catherine; The University of Manchester |
| <b>Primary Subject Heading</b>: | Global health                                                                                                                                                                                                                                                                                                                                                                                                                                                                |
| Secondary Subject Heading:      | Mental health                                                                                                                                                                                                                                                                                                                                                                                                                                                                |
| Keywords:                       | Suicide & self-harm < PSYCHIATRY, PUBLIC HEALTH, MENTAL HEALTH                                                                                                                                                                                                                                                                                                                                                                                                               |
|                                 |                                                                                                                                                                                                                                                                                                                                                                                                                                                                              |

SCHOLARONE™  
Manuscripts



I, the Submitting Author has the right to grant and does grant on behalf of all authors of the Work (as defined in the below author licence), an exclusive licence and/or a non-exclusive licence for contributions from authors who are: i) UK Crown employees; ii) where BMJ has agreed a CC-BY licence shall apply, and/or iii) in accordance with the terms applicable for US Federal Government officers or employees acting as part of their official duties; on a worldwide, perpetual, irrevocable, royalty-free basis to BMJ Publishing Group Ltd ("BMJ") its licensees and where the relevant Journal is co-owned by BMJ to the co-owners of the Journal, to publish the Work in this journal and any other BMJ products and to exploit all rights, as set out in our [licence](#).

The Submitting Author accepts and understands that any supply made under these terms is made by BMJ to the Submitting Author unless you are acting as an employee on behalf of your employer or a postgraduate student of an affiliated institution which is paying any applicable article publishing charge ("APC") for Open Access articles. Where the Submitting Author wishes to make the Work available on an Open Access basis (and intends to pay the relevant APC), the terms of reuse of such Open Access shall be governed by a Creative Commons licence – details of these licences and which [Creative Commons](#) licence will apply to this Work are set out in our licence referred to above.

Other than as permitted in any relevant BMJ Author's Self Archiving Policies, I confirm this Work has not been accepted for publication elsewhere, is not being considered for publication elsewhere and does not duplicate material already published. I confirm all authors consent to publication of this Work and authorise the granting of this licence.

1  
2  
3 **1 Knowledge, attitudes, and experiences of self-harm and suicide in low and**  
4 **2 middle income countries: protocol for a systematic review**

6  
7 3 Rebecca McPhillips\*<sup>1</sup>

8  
9 4 Sadia Nafees<sup>2</sup>

10  
11 5 Anam Elahi<sup>1</sup>

12  
13 6 Saqba Batool<sup>1</sup>

14  
15 7 Murali Krishna<sup>2</sup>

16  
17 8 Anne Kraye<sup>2</sup>

18  
19 9 Peter Huxley<sup>2</sup>

20  
21 10 Nasim Chaudhry<sup>3</sup>,

22  
23 11 Catherine Robinson<sup>1</sup>

24  
25 12 \*Room C4.5, Ellen Wilkinson Building, Oxford Road, Manchester, M13 9PL.

26  
27 13 [Rebecca.mcphillips@manchester.ac.uk](mailto:Rebecca.mcphillips@manchester.ac.uk) +44(0)161 275 5678

28  
29 14 <sup>1</sup> Social Care and Society (SCS), Division of Population Health, Health Services Research and  
30 Primary Care, School of Health Sciences, Faculty of Biology, Medicine and Health, University of  
31 Manchester, Manchester, UK.

32  
33 15 <sup>2</sup> Centre For Mental Health And Society, Bangor University, Wales.

34  
35 16 <sup>3</sup> Chief Executive Officer, Pakistan Institute of Living and Learning, Karachi, Pakistan

36  
37 17 **Word count: 2241**

38  
39 18

40  
41 19

42  
43 20

44  
45 21

46  
47 22

48  
49 23

50  
51 24

52  
53 25

54  
55 26

56  
57 27

58  
59 28

60

## 1      1    **ABSTRACT**

2      2    **Introduction:** Over 800,000 people die due to suicide each year and suicide presents huge  
3      3    psychological, economic and social burdens for individuals, communities and countries as a whole.  
4      4    Low and middle income countries (LMICs) are disproportionately affected by suicide. The strongest  
5      5    risk factor for suicide is a previous suicide attempt, and other types of self-harm have been found to  
6      6    be robust predictors of suicidal behaviour. An approach that brings together multiple sectors including  
7      7    education, labour, business, law, politics and the media is crucial to tackling suicide and self-harm.  
8      8    The World Health Organization highlights that evaluations of the knowledge and attitudes that  
9      9    priority groups, not only healthcare staff, have of mental health and suicidal behaviour are key to  
10     10   suicide prevention strategies. The aim of this systematic review is to examine the knowledge, attitudes  
11     11   and experiences different stakeholders in LMICs have of self-harm and suicide.

12     12   **Methods and analysis:** Medline, Embase, PsycInfo, CINAHL, BNI, Social Sciences and Cochrane  
13     13   library will be searched. Reviewers working independently of each other will screen search results,  
14     14   select studies for inclusion, extract and check extracted data, and rate the quality of the studies using  
15     15   the STROBE and CASP checklists. In anticipation of heterogeneity, a narrative synthesis of  
16     16   quantitative studies will be provided and meta-ethnography will be used to synthesise qualitative  
17     17   studies.

18     18   **Ethics and dissemination:** Ethical approval is not required. A report will be provided for the funding  
19     19   body, and the systematic review will be submitted for publication in a high-impact, peer-reviewed,  
20     20   open access journal. Results will also be disseminated at conferences, seminars, congresses and  
21     21   symposia and to relevant stakeholders.

22  
23     23   **PROSPERO registration number:** CRD42019135323

24  
25     25   **Strengths and limitations of this study**

- 1 • A strength of this systematic review protocol is that it has been written according to the  
2 Preferred Reporting Items for Systematic review and Meta-Analysis (PRISMA-P) 2015  
3 checklist.
- 4 • A strength of the review is that it will conform to the PRISMA statement and to the Cochrane  
5 systematic review literature guidelines when results are reported
- 6 • A strength of this review is that both quantitative and qualitative evidence will be assessed.
- 7 • A limitation of the review is the inclusion of peer reviewed studies only, however language  
8 restrictions will not be applied
- 9 • We anticipate that the quantitative studies included in the review will be heterogenous,  
10 therefore a limitation will be the lack of meta-analysis

## 12 **Keywords**

13 Self-harm; suicide; attitudes; knowledge; experience; quantitative; qualitative; low and middle  
14 income countries, LMICs

## 16 **INTRODUCTION**

17 The World Health Organization (WHO) estimate that over 800,000 people die due to suicide each  
18 year; 1 person every 40 seconds [1]. Suicide disproportionately affects low and middle income  
19 countries (LMICs), in 2014 the WHO reported that 75.5% of suicides globally occur in LMICs, and in  
20 South East Asia suicide is the leading cause of death in 15-29 year olds [1]. However, the under-  
21 reporting and misclassification of suicide as a cause of death in LMICs mean that suicide rates are  
22 likely higher than reported [1, 2]. Every suicide death is a tragedy for families, friends and  
23 communities and suicide presents huge psychological, economic and social burdens for individuals,  
24 communities and countries as a whole [1]. Reducing suicide is a key indicator for the United Nations  
25 sustainable development goal to ensure healthy lives and promote well-being at all ages globally [3].  
26 However, much of the published literature on suicide relates to high income countries (HICs), and to  
27 effect change a better understanding of suicide within the cultural, political and socio-economic

1  
2  
3 1 context of LMICs is needed. Patient profiles, suicide rates, aetiology and methods differ between  
4  
5 2 LMICs and HICs [4]. For example, research to date indicates that the ratio of women to men who die  
6  
7 3 by suicide in LMICs is much lower than in HICs [5]. Furthermore, where marriage is considered to be  
8  
9 4 a protective factor for women in HICs, it is less so for women in some LMICs, and self-immolation  
10  
11 5 and the consumption of pesticides are far more common methods in LMICs than in HICs [6-9].  
12  
13  
14 6

15  
16 7 The strongest risk factor for suicide is a previous suicide attempt, and the WHO suggest that for each  
17  
18 8 adult who dies from suicide there may be 20 others attempting suicide [1]. Suicide attempts and  
19  
20 9 suicide are types of self-harm that are often differentiated from non-suicidal self-injury (NSSI) in  
21  
22 10 terms of intent, frequency, methods, lethality and cognitions [10]. While the intent of suicidal  
23  
24 11 behaviours is to kill oneself, the intent of NSSI is not. NSSI behaviours are more frequent than suicide  
25  
26 12 and suicide attempts, with individuals employing more varying and less lethal methods and it is  
27  
28 13 suggested that the cognitions related to NSSI concern temporary relief while those related to suicidal  
29  
30 14 behaviour concern permanent relief [10-13]. Similarly to the literature on suicide, much of that  
31  
32 15 concerning self-harm is focussed on HICs [14-16], where self-harm has been found to be a robust  
33  
34 16 predictor of suicidal behaviour, with this link remaining after controlling for age, gender, and  
35  
36 17 ethnicity [12, 17-18]. A systematic review of the limited empirical research on self-harm in LMICs  
37  
38 18 found that the prevalence of NSSI and suicide attempts in LMICs was comparable to HICs and that  
39  
40 19 the most common methods of NSSI in LMICs were hitting, cutting, wound picking and biting and  
41  
42 20 these findings were similar to evidence from HICs [16] Risk factors identified for self-harm in LMICs  
43  
44 21 were often family related, for example family conflict, divorced parents and childhood abuse, and  
45  
46 22 protective factors were high family functioning and understanding parents, which were attributed to  
47  
48 23 greater reliance on family in LMICs compared to many Western HICs [16].  
49  
50  
51  
52 24

53  
54 25 Suicide and self-harm in both LMICs and HICs are the result of complex interactions between  
55  
56 26 genetic, psychological, biological, cultural, sociodemographic and social factors [1, 19-20]. Although  
57  
58 27 the healthcare sector clearly has a vital role to play in tackling suicide and self-harm in LMICs, an  
59  
60 28 approach that brings together multiple sectors including education, labour, business, law, politics and



1  
2  
3 1 the media is crucial [1, 21]. The knowledge, attitudes and experiences stakeholders from various  
4  
5 2 sectors have of suicide and self-harm are likely to influence suicide and self-harm prevention and  
6  
7 3 intervention strategies. A recent review by the WHO [21] highlights that evaluations of the knowledge  
8  
9 4 and attitudes that priority groups, for example policy makers and community groups, not only  
10  
11 5 healthcare staff, have of mental health and suicidal behaviour are key to the collection of high quality  
12  
13 6 surveillance data and prevention strategies. Reviews to date have focused on the knowledge, attitudes  
14  
15 7 and experiences that healthcare professionals have towards self-harm and suicide [22-25]. The aim of  
16  
17 8 this systematic review is to examine various stakeholders' knowledge, attitudes and experiences of  
18  
19 9 self-harm and suicide. Therefore, in addition to stakeholders from the healthcare sector, other  
20  
21 10 stakeholders who will be included in this review are people who have experienced self-harm and/or  
22  
23 11 have attempted suicide themselves, and their relatives, friends, and co-workers, and stakeholders from  
24  
25 12 the social, healthcare, government, and criminal justice sectors. We are interested in exploring the  
26  
27 13 range of publications on the broad spectrum of knowledge, attitudes and experiences that these  
28  
29 14 various stakeholders may have concerning suicide and self-harm, including for example, knowledge  
30  
31 15 stakeholders may have on prevalence and risk and protective factors for suicide and self-harm,  
32  
33 16 stigmatising or empathetic attitudes towards those who self-harm, and experiences such as providing  
34  
35 17 or receiving medical treatment for self-harm. This systematic review is being undertaken as part of the  
36  
37 18 South Asia Self Harm Initiative (SASHI) project, which aims to help to find effective responses to  
38  
39 19 self-harm and suicide in South Asia by building capability and capacity in research infrastructure and  
40  
41 20 expertise in the region. Findings from this systematic review will be used to inform the development  
42  
43 21 of a survey on knowledge, attitudes and well-being in South Asia. Thus, we are particularly interested  
44  
45 22 in studies conducted in South Asia and countries with comparable healthcare systems or cultural  
46  
47 23 backgrounds.  
48  
49  
50  
51  
52  
53

## 54 **Research question**

55  
56 26 The SPICE (Setting, Perspective, phenomena of Interest, Comparison, Evaluation) framework was  
57  
58 27 used to generate the research question that will be addressed by this systematic review [26]:  
59  
60

- 1
- 2
- 3
- 4
- 5
- 6
- 7
- 8
- 9
- 10
- 11
- 12
- 13
- 14
- 15
- 16
- 17
- 18
- 19
- 20
- 21
- 22
- 23
- 24
- 25
- 26
- 27
- 28
- 29
- 30
- 31
- 32
- 33
- 34
- 35
- 36
- 37
- 38
- 39
- 40
- 41
- 42
- 43
- 44
- 45
- 46
- 47
- 48
- 49
- 50
- 51
- 52
- 53
- 54
- 55
- 56
- 57
- 58
- 59
- 60
- 1 • What are stakeholders' knowledge, attitudes and experiences of self-harm and suicide in
  - 2 LMICs?

## 4 **METHODS AND ANALYSIS**

5 This protocol conforms to the Preferred Reporting Items for Systematic Reviews and Meta-Analyses  
6 Protocols (PRISMA-P) checklist (see Supplementary File 1) [27]. We will conform to the PRISMA  
7 statement and to the Cochrane systematic review literature guidelines when reporting the results [28-  
8 29]. This systematic review has been registered on PROSPERO [30].

### 10 **Search strategy**

11 A Betsi Cadwaladr University Health Board (BCUHB) librarian with expertise in systematic reviews  
12 has assisted the authors in the development of the search strategy (see Appendix 1). We will search  
13 Medline, Embase, PsycInfo, CINAHL, BNI, Social Sciences and Cochrane library. We will not apply  
14 any language restrictions to the search criteria. EndNote and Microsoft Word will be used to manage  
15 initial search results, screening and data throughout the review. We will update the searches prior to  
16 publication to ensure the latest papers are included. Reference lists from included studies and any  
17 identified systematic or literature reviews will also be searched by hand. Study authors will be  
18 contacted in instances when it has not been possible to retrieve full text articles and when clarification  
19 regarding inclusion criteria e.g. participant age, is required.

### 21 **Study selection criteria**

22 Inclusion criteria are empirical studies conducted in LMICs, as defined by the Organisation for  
23 Economic Co-operation and Development [31], irrespective of the study design, whose focus is on the  
24 knowledge, attitudes or experiences of stakeholders towards self-harm and/or suicide, where  
25 participants are aged 16 years and above. Studies that include stakeholders' knowledge, attitudes and  
26 experiences of suicide and self-harm related to those under 16 will be included. Stakeholders are  
27 people who have experienced self-harm and/or have attempted suicide themselves, relatives, friends,

1 co-workers, and healthcare workers of those who have self-harmed, attempted or completed suicide  
2 and people in the social, healthcare, government, and criminal justice sectors. Exclusion criteria are  
3 studies conducted in high income countries (HICs) and studies whose participants are not aged 16  
4 years and above. Studies whose main focus is on the prevalence and/or predictors of self-harm and/or  
5 suicide, relationships between state and/or trait characteristics and self-harm and/or suicide,  
6 euthanasia, terrorism, or epidemiology will also be excluded. Systematic and literature reviews will be  
7 consulted for relevant references but will not be included in the review. Opinion pieces, editorials,  
8 book reviews, and conference and poster abstracts will not be included in the review.

9  
10 The selection of studies for inclusion will adhere to the Cochrane guidelines and the process of  
11 selection of eligible studies will be illustrated via a PRISMA diagram [29]. Following deduplication  
12 of search results in EndNote, the following screening process will be undertaken in order to select  
13 studies for inclusion in the systematic review:

14  
15 1) Titles and abstracts will be read by two reviewers independently, and relevance and fit with  
16 the inclusion criteria will be assessed. Those of no obvious relevance will be excluded and  
17 any disagreements will be resolved with a third reviewer (and the wider expert group if  
18 necessary).

19  
20 2) Full text articles of remaining studies will be retrieved and read by two reviewers  
21 independently to assess their suitability for inclusion in the final review, disagreements will  
22 be resolved by discussion with a third reviewer (and the wider expert group if necessary).

23 Both reviewers will populate a piloted pro-forma for each full text paper read (see Appendix  
24 2).

## 25 26 **Data extraction**

1  
2  
3 1 Data will be extracted from selected studies by one reviewer, and a second reviewer will check for  
4  
5 2 accuracy. Extracted data will be recorded on a piloted pro-forma (see Appendix 2), and will reflect the  
6  
7 3 inclusion criteria and the designated aims of the review, derived from the article as a whole.  
8  
9 4 Discrepancies will be resolved through discussion (with the wider expert group if necessary).  
10  
11 5 Additional data will be requested from study authors when necessary. Data extraction of qualitative  
12  
13 6 studies (and for qualitative components in studies with mixed methods) will adhere to the same  
14  
15 7 methods and will be reviewed independently.  
16  
17  
18  
19

## 20 9 **Outcomes**

21  
22 10 Outcomes of interest include:

- 23  
24  
25 11 • The identification of relevant information on stakeholders' knowledge, attitudes and  
26  
27 12 experiences of self-harm and suicide, particularly in South Asia and in countries with  
28  
29 13 comparable healthcare systems and cultural backgrounds
- 30  
31 14 • The quantitative methods and measures that have been used to investigate stakeholders'  
32  
33 15 attitudes towards and knowledge about self-harm and suicide and their psychometric  
34  
35 16 properties
- 36  
37 17 • The qualitative methods that have been used to investigate stakeholders' attitudes towards,  
38  
39 18 knowledge about, and experiences of self-harm and suicide.

40  
41  
42  
43 19 The identified outcomes will inform the development of a survey on knowledge, attitudes and well-  
44  
45 20 being in South Asia as part of the SASHI project.  
46  
47  
48

## 49 22 **Quality assessment**

50  
51 23 All eligible studies will be subject to quality appraisal. The quality of included quantitative studies  
52  
53 24 will be appraised using the STROBE checklist [32]. The STROBE Statement consists of a checklist of  
54  
55 25 22 items, which relate to the title, abstract, introduction, methods, results and discussion sections of  
56  
57 26 articles. Eighteen items are common to cohort studies, case-control studies and cross-sectional studies  
58  
59 27 and four are specific to each of the three study designs. The quality of included qualitative studies will  
60

1  
2  
3 1 be appraised using the CASP checklist [33]. The 10-item CASP tool was considered to be the most  
4  
5 2 suitable tool to consider the quality parameters of qualitative work, and is a well-validated and  
6  
7 3 accepted tool [28]. Both the STROBE and CASP checklists will be applied independently by two  
8  
9 4 reviewers and any disagreements will be resolved with a third reviewer (and the wider expert group if  
10  
11 5 necessary).  
12  
13  
14 6

15  
16 7 Studies will not be excluded on the basis of poor quality alone, rather all studies that meet the  
17  
18 8 inclusion criteria will be included in the review. This low threshold for inclusion will be applied so  
19  
20 9 that the review can benefit from researcher insight and theoretical as well as empirical contributions.  
21  
22 10 The relative quality of included studies will be critically considered and discussed in the review.  
23  
24 11

## 26 12 **Descriptive analysis and data synthesis**

27  
28 13 We anticipate that the quantitative studies included in the review will be heterogenous and this will  
29  
30 14 prevent meta-analysis. We will provide a narrative synthesis of quantitative studies, structured around  
31  
32 15 population characteristics and the geographical region of studies. We will provide summaries of the  
33  
34 16 quantitative methods and measures used to investigate stakeholders' attitudes towards and knowledge  
35  
36 17 about self-harm and suicide and their psychometric properties.  
37  
38 18

39  
40  
41 19 Meta-ethnography will be used to synthesise qualitative studies [34]. Initially reciprocal translation  
42  
43 20 will be performed by comparing the concepts presented in different studies. A chronological approach  
44  
45 21 will be taken to reciprocal translation; studies will be arranged chronologically, concepts from papers  
46  
47 22 one and two will be compared, and the synthesis of papers one and two will then be compared with  
48  
49 23 paper three, and so forth, as is described elsewhere [35]. When contradictions between studies are  
50  
51 24 identified, we will perform refutational synthesis by exploring and explaining these. A 'lines-of-  
52  
53 25 argument' synthesis, that links and explains concepts presented by different studies, will be conducted  
54  
55 26 so that an interpretation of all included studies can be presented.  
56  
57  
58 27  
59  
60

1  
2  
3 1 Two reviewers will lead data synthesis. Emergent analysis, and any discrepancies, will be discussed  
4  
5 2 with other members of the review team. Microsoft Office software will be used to facilitate data  
6  
7 3 synthesis.  
8  
9 4

#### 11 5 **Patient and public involvement**

13 6 No patients or members of the public were involved in the design of this study.  
14  
15 7

#### 17 8 **Amendments**

19 9 An amendment has been made to the initial registration of this systematic review in PROSPERO,  
20  
21 10 which details that only studies from LMICs will be included in this review, and studies from HICs  
22  
23 11 will be excluded from this review. Any further amendments to this protocol will be documented in the  
24  
25 12 full review.  
26  
27 13

#### 30 14 **ETHICS AND DISSEMINATION**

32 15 Ethics approval is not required as this is a protocol for the systematic review of previously published  
33  
34 16 data. In addition to a report to the funding body, we intend to submit the systematic review for  
35  
36 17 publication in a high-impact, peer-reviewed journal. We will select an open access journal to ensure  
37  
38 18 free access to undergraduate and graduate students, researchers, academics and research groups.  
39  
40 19 Results will also be disseminated at conferences seminars, congresses and symposia and to relevant  
41  
42 20 stakeholders.  
43  
44 21

47 22 **Acknowledgements:** The authors would like to thank Mrs Nia Morris (NM) from BCUHB library for  
48  
49 23 her contribution to the development of the search strategy.  
50  
51 24

53 25 **Contributions:** CR, RM, PH, AK, MK conceived the research idea. SN led the development of the  
54  
55 26 search strategy, with input from NM, RM, AK, PH. RM, SN, MK, AK, PH, CR conceived the  
56  
57 27 manuscript. RM lead the drafting of the manuscript with contributions from SN, AE, SB, MK, AK,  
58  
59 28 PH, NC, CR. All authors approved the final manuscript.

1  
2  
3 1  
4  
5 2 **Funding:** This manuscript was funded by UK Research and Innovation Global Challenge Research  
6  
7 3 Fund (ref: MR/P028144/1). The funder did not have any role in developing this protocol.  
8  
9 4

10  
11 5 **Competing interests:** None declared  
12  
13 6

## 14 7 **References**

- 15  
16 8 [1] World Health Organization. Preventing suicide: a global imperative. World Health Organization,  
17  
18 9 2014. Available:  
19  
20 10 [https://apps.who.int/iris/bitstream/handle/10665/131056/9789241564779\\_eng.pdf;jsessionid=](https://apps.who.int/iris/bitstream/handle/10665/131056/9789241564779_eng.pdf;jsessionid=F6255CAAD6496DA078DE41FAB0C5CCBF?sequence=1)  
21  
22 11 [F6255CAAD6496DA078DE41FAB0C5CCBF?sequence=1](https://apps.who.int/iris/bitstream/handle/10665/131056/9789241564779_eng.pdf;jsessionid=F6255CAAD6496DA078DE41FAB0C5CCBF?sequence=1) . [Accessed 04 May 2020].  
23  
24 12  
25  
26 13 [2] Jordans MJD, Kaufman A, Brenman NF, *et al.* Suicide in South Asia: a scoping review. *BMC*  
27  
28 14 *Psychiatry* 2014;**14**:358.doi:10.1186/s12888-014-0358-9 pmid:  
29  
30 15 <https://www.ncbi.nlm.nih.gov/pubmed/25539951>  
31  
32 16  
33  
34 17 [3] United Nations. Department of economic and social affairs sustainable development: Ensure  
35  
36 18 healthy lives and promote well-being for all at all ages. United Nations, 2015. Available:  
37  
38 19 <https://sdgs.un.org/goals/goal3> [Accessed 20 December 2020]  
39  
40 20  
41  
42 21 [4] Ward E, McCartney T, Arscott-Mills S, *et al.* The Jamaica injury surveillance system: a profile of  
43  
44 22 the intentional and unintentional injuries in Jamaican hospitals. *West Indian Med J* 2010;**59**:7-  
45  
46 23 13. pmid: <https://www.ncbi.nlm.nih.gov/pubmed/20931906>  
47  
48 24  
49  
50 25 [5] World Health Organization. Suicide in the World: global health estimates. World Health  
51  
52 26 Organization, 2019. Available: <https://www.who.int/publications/i/item/suicide-in-the-world>  
53  
54 27 [Accessed 20 December 2020]  
55  
56 28  
57  
58  
59  
60

- 1  
2  
3 1 [6] Aggarwal S. Suicide in India. *Br Med Bull* 2015;**114**:127-134.doi:10.1093/bmb/ldv018 pmid:  
4  
5 2 <https://www.ncbi.nlm.nih.gov/pubmed/25958380>  
6  
7 3  
8  
9 4 [7] Gururaj G, Isaac MK, Subbakrishna DK, *et al*. Risk factors for completed suicides: a case-control  
10  
11 5 study from Bangalore, India. *Inj Control Saf Promot* 2004;**3**:183-  
12  
13 6 191.doi:10.1080/156609704/233/289706 pmid: [https://www.ncbi.nlm.nih.gov/pubmed/](https://www.ncbi.nlm.nih.gov/pubmed/15764105)  
14  
15 7 15764105  
16  
17 8  
18  
19 9 [8] Laloe V. Patterns of deliberate self-burning in various parts of the world: a review. *Burns*  
20  
21 10 2004;**30**:207-215.doi:10.1016/j.burns.2003.10.018 pmid:  
22  
23 11 <https://www.ncbi.nlm.nih.gov/pubmed/15082345>  
24  
25 12  
26  
27 13 [9] Vijayakumar L. Suicide in women. *Indian J Psychiatry* 2015;**57**:S233-S238.doi:10.4103/0019-  
28  
29 14 5545.161484 pmid: <https://www.ncbi.nlm.nih.gov/pubmed/26330640>  
30  
31 15  
32  
33 16 [10] Jacobson CM, Gould M. The epidemiology and phenomenology of non-suicidal self-injurious  
34  
35 17 behavior among adolescents: a critical review of the literature. *Arch Suicide Res* 2007;**11**:12-  
36  
37 18 47doi:10.1080/13811110701247602 pmid: <https://www.ncbi.nlm.nih.gov/pubmed/17453692>  
38  
39 19  
40  
41 20 [11] Muehlenkamp JJ. Self-injurious behavior as a separate clinical syndrome. *Am J Orthopsychiatry*  
42  
43 21 2005;**75**:324-333.doi:10.1037/0002-9432.75.2.324 pmid:  
44  
45 22 <https://www.ncbi.nlm.nih.gov/pubmed/15839768>  
46  
47 23  
48  
49 24 [12] Nock MK. Self-injury. *Annu Rev Clin Psychol* 2010;**6**:339-363  
50  
51 25 doi:10.1146/annurev.clinpsy.121208.131258. pmid:  
52  
53 26 <https://www.ncbi.nlm.nih.gov/pubmed/20192787>  
54  
55 27  
56  
57  
58  
59  
60



- 1  
2  
3 [13] Walsh BW. *Treating self-injury: A practical guide*. New York, USA: Guilford Press 2005  
4  
5 2  
6  
7 [14] Gholamrezaei M, Stefano JD, Heath NL. Nonsuicidal self-injury across cultures and ethnic and  
8  
9 racial minorities: a review. *Int J Psychol* 2017;**52**:316-326. doi:10.1002/ijop.12230 pmid:  
10  
11 <https://www.ncbi.nlm.nih.gov/pubmed/26644040>  
12  
13 6  
14  
15 [15] Aggarwal S, Berk M. Nonsuicidal self-injury in Indian adolescents: nonexistent or  
16  
17 unacknowledged? *Int J Soc Psychiatry* 2015;**61**:516-517doi:10.1177/0020764015579739  
18  
19 pmid: <https://www.ncbi.nlm.nih.gov/pubmed/26209701>  
20  
21  
22 10  
23  
24 [16] Aggarwal S, Patton G, Reavley N. Youth self-harm in low- and middle- income countries:  
25  
26 systematic review of the risk and protective factors. *Int J Soc Psychiatry* 2017;**63**:359-375doi:  
27  
28 10.1177/0020764017700175 pmid: <https://www.ncbi.nlm.nih.gov/pubmed/28351292>  
29  
30  
31 14  
32  
33 [17] Hamza CA, Stewart SL, Willoughby T. Examining the link between nonsuicidal self-injury and  
34  
35 suicidal behaviour: a review of the literature and integrated model. *Clin Psychol Rev* 2012;**6**  
36  
37 482-95.doi:10.1016/j.cpr.2012.05.003. pmid:  
38  
39 <https://www.ncbi.nlm.nih.gov/pubmed/22717336>  
40  
41  
42  
43 [18] Owens D, Horrocks J, House A. Fatal and non-fatal repetition of self-harm: systematic review.  
44  
45 *Br J Psychiatry* 2002;**181**:193-99. doi: 10.1192/bjp.181.3.193 pmid:  
46  
47 <https://www.ncbi.nlm.nih.gov/pubmed/12204922>  
48  
49  
50  
51 [19] Hawton K, Sanders KEA, O'Connor RC. Self-harm and suicide in adolescents. *Lancet*  
52  
53 2012;**379**:2373-82. doi: 10.1016/S0140-6736(12)60322-5 pmid:  
54  
55  
56 <https://www.ncbi.nlm.nih.gov/pubmed/22726518>  
57  
58  
59  
60

- 1  
2  
3 1 [20] Yip PSF, Caine E, Yousef S, *et al.* Means restriction for suicide prevention. *Lancet*  
4  
5 2 2012;379:2393-2399. doi: 10.1016/S0140-6736(12)60521-2  
6  
7 3  
8  
9 4 [21] World Health Organization. National suicide prevention strategies: progress, examples and  
10  
11 5 indicators. World Health Organization, 2018. Available:  
12  
13 6 <https://apps.who.int/iris/bitstream/handle/10665/279765/9789241515016-eng.pdf?ua=1> .  
14  
15 7 [accessed 04 May 2020].  
16  
17 8  
18  
19 9 [22] Karman P, Kool N, Poslawsky IE, *et al.* Nurses' attitudes towards self-harm: a literature review.  
20  
21 10 *J Psychiatr Ment Health Nurs* 2015;**22**:65-75. doi: 10.1111/jpm.12171 pmid:  
22  
23 11 <https://www.ncbi.nlm.nih.gov/pubmed/25490929>  
24  
25 12  
26  
27 13 [23] O'Connor S, Glover L. Hospital staff experiences of their relationships with adults who self-  
28  
29 14 harm: a meta-synthesis. *Psychol Psychother* 2017;**90**:480-501. doi: 10.1111/papt.12113.  
30  
31 15 pmid: <https://www.ncbi.nlm.nih.gov/pubmed/28035740>  
32  
33 16  
34  
35 17 [24] Rees N, Rapport F, Thomas G, *et al.* Perceptions of paramedic and emergency care workers of  
36  
37 18 those who self-harm: a systematic review of the quantitative literature. *J Psychosom Res*  
38  
39 19 2014;**77**:449-456. doi: 10.1016/j.jpsychores.2014.09.006. pmid:  
40  
41 20 <https://www.ncbi.nlm.nih.gov/pubmed/25263398>  
42  
43 21  
44  
45 22 [25] Saunders KEA, Hawton K, Fortune S, *et al.* Attitudes and knowledge of clinical staff regarding  
46  
47 23 people who self-harm: a systematic review. *J Affect Disord* 2012;**139**:205-216. doi:  
48  
49 24 10.1016/j.jad.2011.08.024 pmid: <https://www.ncbi.nlm.nih.gov/pubmed/21925740>  
50  
51 25  
52  
53 26 [26] Booth A. Clear and present questions: formulating questions for evidence based practice. *Library*  
54  
55 27 *Hi Tech* 2006;**24**:355-368. doi: 10.1108/07378830610692127  
56  
57 28  
58  
59  
60

- 1  
2  
3 1 [27] Shamseer L, Moher D, Clarke M, *et al.* Preferred reporting items for systematic review and meta-  
4 analysis protocols (PRISMA-P) 2015: elaboration and explanation. *BMJ* 2015;**350**:g7647.  
5 2  
6 doi: 10.1136/bmj.g7647 pmid: <https://www.ncbi.nlm.nih.gov/pubmed/25555855>  
7 3  
8 4  
9  
10  
11 5 [28] Higgins JPT, Green S (editors). Cochrane handbook for systematic reviews of interventions  
12 Version 6. The Cochrane Collaboration, 2019. Available: <http://handbook.cochrane.org>.  
13 6  
14 [Accessed 04 May 2020].  
15 7  
16 8  
17  
18  
19  
20 9 [29] Liberati A, Altman DG, Tetzlaff J, *et al.* The PRISMA statement for reporting systematic  
21 reviews and meta-analyses of studies that evaluate healthcare interventions: explanation and  
22 10 elaboration. *BMJ* 2009;**339**:b2700. doi: 10.1136/bmj.b2700 pmid:  
23 11  
24 <https://www.ncbi.nlm.nih.gov/pubmed/19622552>  
25 12  
26 13  
27  
28  
29  
30 14 [30] McPhillips R, Nafees S, Krishna M, *et al.* Knowledge, attitudes, and experiences of self-harm  
31 and suicide in low and middle income countries: a systematic review. PROSPERO 2019  
32 15 CRD42019135323. Available:  
33 16  
34 [https://www.crd.york.ac.uk/prospéro/display\\_record.php?ID=CRD42019135323](https://www.crd.york.ac.uk/prospéro/display_record.php?ID=CRD42019135323) [Accessed  
35 17  
36 04 May 2020]  
37 18  
38 19  
39  
40  
41  
42  
43 20 [31] Organisation for Economic Co-operation and Development. DAC List of ODA recipients for  
44 reporting on aid in 2018 and 2019. Organisation for Economic Co-operation and  
45 21 Development, 2019. Available: [http://www.oecd.org/dac/financing-sustainable-](http://www.oecd.org/dac/financing-sustainable-development/development-finance-standards/dac-list.htm)  
46 22 [development/development-finance-standards/dac-list.htm](http://www.oecd.org/dac/financing-sustainable-development/development-finance-standards/dac-list.htm) [Accessed 04 May 2020]  
47 23  
48 24  
49  
50  
51  
52  
53 25 [32] von Elm E, Altman DG, Egger M, *et al.* STROBE Initiative. The strengthening the reporting in  
54 26 observational studies in epidemiology (STROBE) statement guidelines for reporting  
55 27 observational studies. *Lancet* 2007;**370**:1453-57 doi: 0.1016/S0140-6736(07)61602-X pmid:  
56 28  
57 <https://www.ncbi.nlm.nih.gov/pubmed/18064739>  
58  
59  
60

1  
2  
3  
4  
5  
6  
7  
8  
9  
10  
11  
12  
13  
14  
15  
16  
17  
18  
19  
20  
21  
22  
23  
24  
25  
26  
27  
28  
29  
30  
31  
32  
33  
34  
35  
36  
37  
38  
39  
40  
41  
42  
43  
44  
45  
46  
47  
48  
49  
50  
51  
52  
53  
54  
55  
56  
57  
58  
59  
601  
2  
3  
4  
5  
6  
7  
8  
9  
10  
11  
12  
13  
14  
15  
16  
17  
18  
19  
20  
21  
22  
23  
24  
25  
26  
27  
28  
29  
30  
31  
32  
33  
34  
35  
36  
37  
38  
39  
40  
41  
42  
43  
44  
45  
46  
47  
48  
49  
50  
51  
52  
53  
54  
55  
56  
57  
58  
59  
60

[33] Critical Appraisal Skills Programme. CASP qualitative checklist. Critical Appraisal Skills Programme , 2018. Available: <https://casp-uk.net/wp-content/uploads/2018/01/CASP-Qualitative-Checklist-2018.pdf>  
[Accessed: 04 May 2020]

[34] Noblit GW, Hare RD. Meta-ethnography: synthesising qualitative studies. Sage Publications.

[35] Atkins S, Lewin S, Smith H *et al*. Conducting a meta-ethnography of qualitative literature: lessons learnt. *BMC Med Res Methodol* 2008;**8**:21. doi: 10.1186/1471-2288-8-21 pmid: <https://www.ncbi.nlm.nih.gov/pubmed/18416812>

1  
2  
3  
4  
5  
6  
7  
8  
9  
10  
11  
12  
13  
14  
15  
16  
17  
18  
19  
20  
21  
22  
23  
24  
25  
26  
27  
28  
29  
30  
31  
32  
33  
34  
35  
36  
37  
38  
39  
40  
41  
42  
43  
44  
45  
46  
47  
48  
49  
50  
51  
52  
53  
54  
55  
56  
57  
58  
59  
60

For peer review only

**Appendix 1: Knowledge, attitudes, and experiences of self-harm and suicide in low and middle income countries: Medline search strategy**

**Self-harm and suicide terms**

- 1 Suicide/
- 2 Suicide.mp
- 3 Suicide, Attempted/
- 4 Suicide, Attempted.mp
- 5 Self-Injurious Behavior/
- 6 Self-Injurious Behavior.mp
- 7 Self-Mutilation/
- 8 Self-Mutilation.mp
- 9 Suicidal Ideation/
- 10 Suicidal Ideation.mp
- 11 Attempted Suicide/
- 12 Attempted Suicide.mp
- 13 Drug Overdose/
- 14 Drug Overdose.mp
- 15 ((Self adj2 cut\$) or (para adj suicid\$) or (attempt\$ adj suicide\$) or (suicid\$ adj behavio\$)).mp.
- 16 (auto?mutilat\$ or cutt\$ or over?dos\$ or self?destruct\$ or self?harm\$ or self?immolat\$ or self?inflict\$ or self?injur\$ or self?mutilat\$ or self?poison\$ or suicide\$ or self?burn\$).mp.
- 17 Or/1-16

**Stakeholder terms**

- 18 exp Health Personnel/
- 19 Health Personnel.mp
- 20 exp PHYSICIANS/
- 21 PHYSICIANS.mp
- 22 exp Personnel, Hospital/
- 23 Personnel, Hospital.mp
- 24 Social Workers/
- 25 Social Workers.mp
- 26 ((doctor\$ or physician\$ or hosp\$ or medic\$ or health?care or social or wel?fare) adj (profession\$ or staff\$ or officer\$ or person\$ or worker\$)).mp
- 27 Family/
- 28 Famil\$.mp
- 29 Friends/
- 30 Friend\$.mp
- 31 Caregivers/
- 32 Caregiver\$.mp
- 33 Criminals/
- 34 Criminal\$.mp
- 35 Prisoners/
- 36 Prison\$.mp
- 37 Social Justice/
- 38 Soci\$ adj Just\$.mp
- 39 (partner\$ or parent\$ or grandparent\$ or children or sibling\$ or famil\$ or friend\$ or relative\$).mp.
- 40 (communit\$ or societ\$ or government\$).mp.
- 41 (criminal\$ or offender\$ or prisoner\$ or in?mate\$).mp.
- 42 (justice adj system\$).mp.

1  
2  
3 **43** or/18-42

4 **Knowledge and attitude terms**

5 **44** Attitude/

6 **45** Attitude of Health Personnel/

7 **46** Attitude to Death/

8 **47** Knowledge/

9 **48** Health Knowledge, Attitudes, Practice/

10 **49** Awareness/

11 **50** Education/

12 **51** Health Education/

13 **52** ((train\$ or trainer\$ or experienc\$ or perspectiv\$ or knowledg\$ or attitud\$ or awaren\$ or  
14 educat\$) adj health).mp.

15 **53** social behavior/ or help-seeking behavior/ or self-control/ or shyness/ or social  
16 adjustment/ or social isolation/ or social marginalization/ or social skills/ or social  
17 stigma/ or social exclusion/ or social inclusion

18 **54** Prejudice/

19 **55** Taboo/

20 **56** exp Shame/

21 **57** (tabo\$ or sham\$ or stigma\$ or prejudice\$ or help?seek\$ behavior\$ or self?control\$ or  
22 shy\$ or (social adj adjust\$ or behavio\$ or isolate\$ or margin\$ or Stigm\$ or skil\$)).mp

23 **58** or/44-57

24 **LMIC terms**

25 **59** Developing Countries/

26 **60** "low and middle income countr\$".ab,ti.

27 **61** LMIC.mp.

28 **62** india/ or sikkim/ or pakistan/

29 **63** exp Asia/

30 **64** or/59-63

31 **Self-harm and suicide, stakeholders, knowledge and attitude and LMIC combined (with  
32 limits)**

33 **65** 17 and 43 and 58 and 64

34 **66** limit 65 to humans

35 **67** limit 66 (adolescent <13 to 17 years> or adult <18 to 64 years> or aged <65+ years>)  
36 (aged or "aged, 80 and over" or "frail elderly" or "middle aged" or "young adult" or  
37 adults or "teenager" or adolescent).mp  
38  
39  
40  
41  
42  
43  
44  
45  
46  
47  
48  
49  
50  
51  
52  
53  
54  
55  
56  
57  
58  
59  
60

## Appendix 2: Knowledge, attitudes, and experiences of self-harm and suicide in low and middle income countries systematic review: data extraction form

### Notes for reviewers

Record any missing information as unclear or not described to ensure it is clear that the information was not found in the paper, not that you forgot to extract it

| General information                                                                                                              |                                                                                                                                                                                                                                                                                                                                                                                                                                                                                                                                                                                                                                                                                                                                        |                          |
|----------------------------------------------------------------------------------------------------------------------------------|----------------------------------------------------------------------------------------------------------------------------------------------------------------------------------------------------------------------------------------------------------------------------------------------------------------------------------------------------------------------------------------------------------------------------------------------------------------------------------------------------------------------------------------------------------------------------------------------------------------------------------------------------------------------------------------------------------------------------------------|--------------------------|
| Date form completed                                                                                                              |                                                                                                                                                                                                                                                                                                                                                                                                                                                                                                                                                                                                                                                                                                                                        |                          |
| Reviewer extracting data                                                                                                         |                                                                                                                                                                                                                                                                                                                                                                                                                                                                                                                                                                                                                                                                                                                                        |                          |
| Study title                                                                                                                      |                                                                                                                                                                                                                                                                                                                                                                                                                                                                                                                                                                                                                                                                                                                                        |                          |
| Study authors                                                                                                                    |                                                                                                                                                                                                                                                                                                                                                                                                                                                                                                                                                                                                                                                                                                                                        |                          |
| Journal                                                                                                                          |                                                                                                                                                                                                                                                                                                                                                                                                                                                                                                                                                                                                                                                                                                                                        |                          |
| Year of publication                                                                                                              |                                                                                                                                                                                                                                                                                                                                                                                                                                                                                                                                                                                                                                                                                                                                        |                          |
| Study author contact details                                                                                                     |                                                                                                                                                                                                                                                                                                                                                                                                                                                                                                                                                                                                                                                                                                                                        |                          |
| Notes                                                                                                                            |                                                                                                                                                                                                                                                                                                                                                                                                                                                                                                                                                                                                                                                                                                                                        |                          |
| Study eligibility for inclusion in review                                                                                        |                                                                                                                                                                                                                                                                                                                                                                                                                                                                                                                                                                                                                                                                                                                                        |                          |
| Main focus on stakeholders' knowledge, attitudes and experiences of self-harm and/or suicide (excluding euthanasia or terrorism) | Yes/No                                                                                                                                                                                                                                                                                                                                                                                                                                                                                                                                                                                                                                                                                                                                 | Location in text (pg. #) |
| Study population aged 16 and above (or can data from those aged 16 and above only can be extracted?)                             | Yes/No                                                                                                                                                                                                                                                                                                                                                                                                                                                                                                                                                                                                                                                                                                                                 | Location in text (pg. #) |
| Low-middle income country                                                                                                        | Yes/No                                                                                                                                                                                                                                                                                                                                                                                                                                                                                                                                                                                                                                                                                                                                 | Location in text (pg. #) |
| Include or exclude                                                                                                               | Include/Exclude                                                                                                                                                                                                                                                                                                                                                                                                                                                                                                                                                                                                                                                                                                                        |                          |
| Reason for exclusion                                                                                                             | Reasons for exclusion<br>1) Knowledge, attitudes and experience of self-harm/suicide not main concern of study (including terrorism and euthanasia) include main phenomenon being studied in notes – to be reviewed after 25 studies<br>1a) Completely irrelevant topic e.g. paper on depression, no mention of self-harm/suicide 1b) Focus on prevalence of suicide/self-harm 1c) Focus on risk factors of suicide/self-harm 1d) Focus on intervention only 1e) Mention of self-harm/suicide however topic not relevant to attitudes, knowledge and experiences of self-harm/suicide<br>2) Research not conducted in LMICs<br>3) Research population not 16 and over<br>4) Literature review<br>5) Commentary, book review, editorial |                          |
| Notes                                                                                                                            |                                                                                                                                                                                                                                                                                                                                                                                                                                                                                                                                                                                                                                                                                                                                        |                          |
| Characteristics of included studies: Participants                                                                                |                                                                                                                                                                                                                                                                                                                                                                                                                                                                                                                                                                                                                                                                                                                                        |                          |



|                                                                                                                                                                    | Description as stated in paper | Location in text (pg. #) |
|--------------------------------------------------------------------------------------------------------------------------------------------------------------------|--------------------------------|--------------------------|
| Study location (Country and state/city/area) e.g. India, Bangalore                                                                                                 |                                |                          |
| Study setting e.g. hospital, community                                                                                                                             |                                |                          |
| Study population e.g. nurses, community members                                                                                                                    |                                |                          |
| Informed consent obtained                                                                                                                                          | <i>Yes, No, Unclear</i>        |                          |
| Total number of participants                                                                                                                                       |                                |                          |
| Exclusions and withdrawals                                                                                                                                         |                                |                          |
| Participant demographics e.g.<br>Age<br>Sex<br>Race/Ethnicity<br>Religious beliefs<br>Mental illness diagnosis<br>Physical illness diagnosis<br>Other demographics |                                |                          |
| Notes                                                                                                                                                              |                                |                          |
| <b>Characteristics of included studies: Methods</b>                                                                                                                |                                |                          |
|                                                                                                                                                                    | Description as stated in paper | Location in text (pg. #) |
| Aim of study/Research question(s) (implicit or explicit in text?)                                                                                                  |                                |                          |
| Study methodology (or methodologies)                                                                                                                               |                                |                          |
| Quantitative measures used e.g. Acceptability of Suicide Scale and information on whether measure is validated (if applicable)                                     |                                |                          |
| Quantitative analysis methods and procedure                                                                                                                        |                                |                          |
| Qualitative methods used e.g. focus group, one-to-one interviews, vignettes (if applicable)                                                                        |                                |                          |
| Theoretical/epistemological perspectives underpinning qualitative research (explicit or reviewer's interpretation)                                                 |                                |                          |
| Qualitative data analysis methods and procedure                                                                                                                    |                                |                          |
| Start date and end date                                                                                                                                            |                                |                          |
| Notes                                                                                                                                                              |                                |                          |
| <b>Characteristics of included studies: Results</b>                                                                                                                |                                |                          |
|                                                                                                                                                                    | Description as stated in paper | Location in text (pg. #) |
| Qualitative results – direct quotes from participants (first order)                                                                                                |                                |                          |

|                                                                                          |                                |                                 |
|------------------------------------------------------------------------------------------|--------------------------------|---------------------------------|
| Qualitative results – study author’s interpretations of data (second order)              |                                |                                 |
| Quantitative results                                                                     |                                |                                 |
| Indicators of acceptability to users (if applicable)                                     |                                |                                 |
| Suggested mechanisms of intervention action (if applicable)                              |                                |                                 |
| <b>Characteristics of included studies: Other information</b>                            |                                |                                 |
|                                                                                          | Description as stated in paper | <i>Location in text (pg. #)</i> |
| Key conclusions of authors                                                               |                                |                                 |
| References to other relevant studies                                                     |                                |                                 |
| Correspondence required by reviewers for further information (who, when, what requested) |                                |                                 |
| Notes                                                                                    |                                |                                 |

**Supplementary file 1: PRISMA-P (Preferred Reporting Items for Systematic review and Meta-Analysis Protocols) 2015 checklist: recommended items to address in a systematic review protocol\***

| Section and topic                 | Item No | Checklist item                                                                                                                                                                                  | Complete |
|-----------------------------------|---------|-------------------------------------------------------------------------------------------------------------------------------------------------------------------------------------------------|----------|
| <b>ADMINISTRATIVE INFORMATION</b> |         |                                                                                                                                                                                                 |          |
| Title:                            |         |                                                                                                                                                                                                 |          |
| Identification                    | 1a      | Identify the report as a protocol of a systematic review                                                                                                                                        | X        |
| Update                            | 1b      | If the protocol is for an update of a previous systematic review, identify as such                                                                                                              | N/A      |
| Registration                      | 2       | If registered, provide the name of the registry (such as PROSPERO) and registration number                                                                                                      | X        |
| Authors:                          |         |                                                                                                                                                                                                 |          |
| Contact                           | 3a      | Provide name, institutional affiliation, e-mail address of all protocol authors; provide physical mailing address of corresponding author                                                       | X        |
| Contributions                     | 3b      | Describe contributions of protocol authors and identify the guarantor of the review                                                                                                             | X        |
| Amendments                        | 4       | If the protocol represents an amendment of a previously completed or published protocol, identify as such and list changes; otherwise, state plan for documenting important protocol amendments | X        |
| Support:                          |         |                                                                                                                                                                                                 |          |
| Sources                           | 5a      | Indicate sources of financial or other support for the review                                                                                                                                   | X        |
| Sponsor                           | 5b      | Provide name for the review funder and/or sponsor                                                                                                                                               | X        |
| Role of sponsor or funder         | 5c      | Describe roles of funder(s), sponsor(s), and/or institution(s), if any, in developing the protocol                                                                                              | X        |
| <b>INTRODUCTION</b>               |         |                                                                                                                                                                                                 |          |
| Rationale                         | 6       | Describe the rationale for the review in the context of what is already known                                                                                                                   | X        |
| Objectives                        | 7       | Provide an explicit statement of the question(s) the review will address with reference to participants, interventions, comparators, and outcomes (PICO)                                        | X        |
| <b>METHODS</b>                    |         |                                                                                                                                                                                                 |          |
| Eligibility criteria              | 8       | Specify the study characteristics (such as PICO, study design, setting, time frame) and report characteristics (such as years considered, language, publication                                 | X        |

1  
2  
3  
4  
5  
6  
7  
8  
9  
10  
11  
12  
13  
14  
15  
16  
17  
18  
19  
20  
21  
22  
23  
24  
25  
26  
27  
28  
29  
30  
31  
32  
33  
34  
35  
36  
37  
38  
39  
40  
41  
42  
43  
44  
45  
46

|                                    |     |                                                                                                                                                                                                                                                     |     |
|------------------------------------|-----|-----------------------------------------------------------------------------------------------------------------------------------------------------------------------------------------------------------------------------------------------------|-----|
|                                    |     | status) to be used as criteria for eligibility for the review                                                                                                                                                                                       |     |
| Information sources                | 9   | Describe all intended information sources (such as electronic databases, contact with study authors, trial registers or other grey literature sources) with planned dates of coverage                                                               | X   |
| Search strategy                    | 10  | Present draft of search strategy to be used for at least one electronic database, including planned limits, such that it could be repeated                                                                                                          | X   |
| Study records:                     |     |                                                                                                                                                                                                                                                     |     |
| Data management                    | 11a | Describe the mechanism(s) that will be used to manage records and data throughout the review                                                                                                                                                        | X   |
| Selection process                  | 11b | State the process that will be used for selecting studies (such as two independent reviewers) through each phase of the review (that is, screening, eligibility and inclusion in meta-analysis)                                                     | X   |
| Data collection process            | 11c | Describe planned method of extracting data from reports (such as piloting forms, done independently, in duplicate), any processes for obtaining and confirming data from investigator                                                               | X   |
| Data items                         | 12  | List and define all variables for which data will be sought (such as PICO items, funding sources), any pre-planned data assumptions and simplifications                                                                                             | X   |
| Outcomes and prioritization        | 13  | List and define all outcomes for which data will be sought, including prioritization of main and additional outcomes, with rationale                                                                                                                | X   |
| Risk of bias in individual studies | 14  | Describe anticipated methods for assessing risk of bias of individual studies, including whether this will be done at the outcome or study level, or both; state how this information will be used in data synthesis                                | X   |
| Data synthesis                     | 15a | Describe criteria under which study data will be quantitatively synthesised                                                                                                                                                                         | X   |
|                                    | 15b | If data are appropriate for quantitative synthesis, describe planned summary measures, methods of handling data and methods of combining data from studies, including any planned exploration of consistency (such as I <sup>2</sup> , Kendall's τ) | N/A |
|                                    | 15c | Describe any proposed additional analyses (such as sensitivity or subgroup analyses, meta-regression)                                                                                                                                               | X   |
|                                    | 15d | If quantitative synthesis is not appropriate, describe the type of summary planned                                                                                                                                                                  | X   |
| Meta-bias(es)                      | 16  | Specify any planned assessment of meta-bias(es) (such as publication bias across studies, selective reporting within studies)                                                                                                                       | N/A |
| Confidence in cumulative evidence  | 17  | Describe how the strength of the body of evidence will be assessed (such as GRADE)                                                                                                                                                                  | N/A |

1  
2  
3 **\* It is strongly recommended that this checklist be read in conjunction with the PRISMA-P Explanation and Elaboration (cite when available) for important**  
4 **clarification on the items. Amendments to a review protocol should be tracked and dated. The copyright for PRISMA-P (including checklist) is held by the**  
5 **PRISMA-P Group and is distributed under a Creative Commons Attribution Licence 4.0.**  
6

7 *From: Shamseer L, Moher D, Clarke M, Ghersi D, Liberati A, Petticrew M, Shekelle P, Stewart L, PRISMA-P Group. Preferred reporting items for systematic review and*  
8 *meta-analysis protocols (PRISMA-P) 2015: elaboration and explanation. BMJ. 2015 Jan 2;349(jan02 1):g7647.*  
9

10  
11  
12  
13  
14  
15  
16  
17  
18  
19  
20  
21  
22  
23  
24  
25  
26  
27  
28  
29  
30  
31  
32  
33  
34  
35  
36  
37  
38  
39  
40  
41  
42  
43  
44  
45  
46

For peer review only

# BMJ Open

## Knowledge, attitudes, and experiences of self-harm and suicide in low and middle income countries: protocol for a systematic review

|                                 |                                                                                                                                                                                                                                                                                                                                                                                                                                                                                                                                             |
|---------------------------------|---------------------------------------------------------------------------------------------------------------------------------------------------------------------------------------------------------------------------------------------------------------------------------------------------------------------------------------------------------------------------------------------------------------------------------------------------------------------------------------------------------------------------------------------|
| Journal:                        | <i>BMJ Open</i>                                                                                                                                                                                                                                                                                                                                                                                                                                                                                                                             |
| Manuscript ID                   | bmjopen-2020-041645.R2                                                                                                                                                                                                                                                                                                                                                                                                                                                                                                                      |
| Article Type:                   | Protocol                                                                                                                                                                                                                                                                                                                                                                                                                                                                                                                                    |
| Date Submitted by the Author:   | 10-Mar-2021                                                                                                                                                                                                                                                                                                                                                                                                                                                                                                                                 |
| Complete List of Authors:       | McPhillips, Rebecca; The University of Manchester, Social Care and Society<br>Nafees, Sadia; Bangor University, North Wales Centre for Primary Care Research<br>Elahi, Anam ; The University of Manchester, Social Care and Society<br>Batool, Saqba; The University of Manchester, Social Care and Society<br>Krishna, Murali; Bangor University<br>Kraye, Anne; Bangor University<br>Huxley, Peter; Bangor University<br>Chaudhry, Nasim ; Pakistan Institute of Living and Learning<br>Robinson, Catherine; The University of Manchester |
| <b>Primary Subject Heading</b>: | Global health                                                                                                                                                                                                                                                                                                                                                                                                                                                                                                                               |
| Secondary Subject Heading:      | Mental health                                                                                                                                                                                                                                                                                                                                                                                                                                                                                                                               |
| Keywords:                       | Suicide & self-harm < PSYCHIATRY, PUBLIC HEALTH, MENTAL HEALTH                                                                                                                                                                                                                                                                                                                                                                                                                                                                              |
|                                 |                                                                                                                                                                                                                                                                                                                                                                                                                                                                                                                                             |

SCHOLARONE™  
Manuscripts

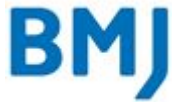

I, the Submitting Author has the right to grant and does grant on behalf of all authors of the Work (as defined in the below author licence), an exclusive licence and/or a non-exclusive licence for contributions from authors who are: i) UK Crown employees; ii) where BMJ has agreed a CC-BY licence shall apply, and/or iii) in accordance with the terms applicable for US Federal Government officers or employees acting as part of their official duties; on a worldwide, perpetual, irrevocable, royalty-free basis to BMJ Publishing Group Ltd ("BMJ") its licensees and where the relevant Journal is co-owned by BMJ to the co-owners of the Journal, to publish the Work in this journal and any other BMJ products and to exploit all rights, as set out in our [licence](#).

The Submitting Author accepts and understands that any supply made under these terms is made by BMJ to the Submitting Author unless you are acting as an employee on behalf of your employer or a postgraduate student of an affiliated institution which is paying any applicable article publishing charge ("APC") for Open Access articles. Where the Submitting Author wishes to make the Work available on an Open Access basis (and intends to pay the relevant APC), the terms of reuse of such Open Access shall be governed by a Creative Commons licence – details of these licences and which [Creative Commons](#) licence will apply to this Work are set out in our licence referred to above.

Other than as permitted in any relevant BMJ Author's Self Archiving Policies, I confirm this Work has not been accepted for publication elsewhere, is not being considered for publication elsewhere and does not duplicate material already published. I confirm all authors consent to publication of this Work and authorise the granting of this licence.

1  
2  
3 **1 Knowledge, attitudes, and experiences of self-harm and suicide in low and**  
4 **2 middle income countries: protocol for a systematic review**

6  
7 3 Rebecca McPhillips\*<sup>1</sup>

8  
9 4 Sadia Nafees<sup>2</sup>

10  
11 5 Anam Elahi<sup>1</sup>

12  
13 6 Saqba Batool<sup>1</sup>

14  
15 7 Murali Krishna<sup>2</sup>

16  
17 8 Anne Kraye<sup>2</sup>

18  
19 9 Peter Huxley<sup>2</sup>

20  
21 10 Nasim Chaudhry<sup>3</sup>,

22  
23 11 Catherine Robinson<sup>1</sup>

24  
25 12 \*Room C4.5, Ellen Wilkinson Building, Oxford Road, Manchester, M13 9PL.

26  
27 13 [Rebecca.mcphillips@manchester.ac.uk](mailto:Rebecca.mcphillips@manchester.ac.uk) +44(0)161 275 5678

28  
29 14 <sup>1</sup> Social Care and Society (SCS), Division of Population Health, Health Services Research and  
30  
31 Primary Care, School of Health Sciences, Faculty of Biology, Medicine and Health, University of  
32  
33 Manchester, Manchester, UK.

34  
35 17 <sup>2</sup> Centre For Mental Health And Society, Bangor University, Wales.

36  
37 18 <sup>3</sup> Chief Executive Officer, Pakistan Institute of Living and Learning, Karachi, Pakistan

38  
39 19 **Word count: 2241**

40  
41  
42 20

43  
44  
45 21

46  
47  
48 22

49  
50  
51 23

52  
53  
54 24

55  
56  
57 25

58  
59  
60 26

27

28



## 1 **ABSTRACT**

2 **Introduction:** Over 800,000 people die due to suicide each year and suicide presents huge  
3 psychological, economic and social burdens for individuals, communities and countries as a whole.  
4 Low and middle income countries (LMICs) are disproportionately affected by suicide. The strongest  
5 risk factor for suicide is a previous suicide attempt, and other types of self-harm have been found to  
6 be robust predictors of suicidal behaviour. An approach that brings together multiple sectors including  
7 education, labour, business, law, politics and the media is crucial to tackling suicide and self-harm.  
8 The World Health Organization highlights that evaluations of the knowledge and attitudes that  
9 priority groups, not only healthcare staff, have of mental health and suicidal behaviour are key to  
10 suicide prevention strategies. The aim of this systematic review is to examine the knowledge, attitudes  
11 and experiences different stakeholders in LMICs have of self-harm and suicide.

12 **Methods and analysis:** Medline, Embase, PsycInfo, CINAHL, BNI, Social Sciences and Cochrane  
13 library will be searched. Reviewers working independently of each other will screen search results,  
14 select studies for inclusion, extract and check extracted data, and rate the quality of the studies using  
15 the STROBE and CASP checklists. In anticipation of heterogeneity, a narrative synthesis of  
16 quantitative studies will be provided and meta-ethnography will be used to synthesise qualitative  
17 studies.

18 **Ethics and dissemination:** Ethical approval is not required. A report will be provided for the funding  
19 body, and the systematic review will be submitted for publication in a high-impact, peer-reviewed,  
20 open access journal. Results will also be disseminated at conferences, seminars, congresses and  
21 symposia and to relevant stakeholders.

22  
23 **PROSPERO registration number:** CRD42019135323

24  
25 **Strengths and limitations of this study**

- 1 • A strength of this systematic review protocol is that it has been written according to the  
2 Preferred Reporting Items for Systematic review and Meta-Analysis (PRISMA-P) 2015  
3 checklist.
- 4 • A strength of the review is that it will conform to the PRISMA statement and to the Cochrane  
5 systematic review literature guidelines when results are reported
- 6 • A strength of this review is that both quantitative and qualitative evidence will be assessed.
- 7 • A limitation of the review is the inclusion of peer reviewed studies only, however language  
8 restrictions will not be applied
- 9 • As it is likely that the quantitative studies included in the review will be heterogenous,  
10 therefore a limitation will be the lack of meta-analysis

## 12 **Keywords**

13 Self-harm; suicide; attitudes; knowledge; experience; quantitative; qualitative; low and middle  
14 income countries, LMICs

## 16 **INTRODUCTION**

17 The World Health Organization (WHO) estimate that over 800,000 people die due to suicide each  
18 year; 1 person every 40 seconds [1]. Suicide disproportionately affects low and middle income  
19 countries (LMICs), in 2014 the WHO reported that 75.5% of suicides globally occur in LMICs, and in  
20 South East Asia suicide is the leading cause of death in 15-29 year olds [1]. However, the under-  
21 reporting and misclassification of suicide as a cause of death in LMICs mean that suicide rates are  
22 likely higher than reported [1, 2]. Every suicide death is a tragedy for families, friends and  
23 communities and suicide presents huge psychological, economic and social burdens for individuals,  
24 communities and countries as a whole [1]. Reducing suicide is a key indicator for the United Nations  
25 sustainable development goal to ensure healthy lives and promote well-being at all ages globally [3].  
26 However, much of the published literature on suicide relates to high income countries (HICs), and to  
27 effect change a better understanding of suicide within the cultural, political and socio-economic

1  
2  
3 1 context of LMICs is needed. Patient profiles, suicide rates, aetiology and methods differ between  
4  
5 2 LMICs and HICs [4]. For example, research to date indicates that the ratio of women to men who die  
6  
7 3 by suicide in LMICs is much lower than in HICs [5]. Furthermore, while marriage is considered to be  
8  
9 4 a protective factor for women in HICs, it is less so for women in some LMICs, and self-immolation  
10  
11 5 and the consumption of pesticides are far more common methods in LMICs than in HICs [6-9].  
12  
13  
14 6

15  
16 7 The strongest risk factor for suicide is a previous suicide attempt, and the WHO suggest that for each  
17  
18 8 adult who dies from suicide there may be 20 others attempting suicide [1]. Harm arising from  
19  
20 9 suicidal behaviour, suicide attempts and suicide are types of self-harm that are often differentiated  
21  
22 10 from non-suicidal self-injury (NSSI) in terms of intent, frequency, methods, lethality and cognitions  
23  
24 11 [10]. The motivation for suicidal behaviours is often to remove suffering and the intent of suicidal  
25  
26 12 behaviours is to end one's life, whereas the intent of NSSI is not. NSSI behaviours are more frequent  
27  
28 13 than suicide and suicide attempts, with individuals employing more varying and less lethal methods,  
29  
30 14 and it is suggested that the cognitions related to NSSI concern temporary relief while those related to  
31  
32 15 suicidal behaviour concern permanent relief [10-13]. Similarly to the literature on suicide, much of  
33  
34 16 that concerning NSSI is focussed on HICs [14-16], where NSSI has been found to be a robust  
35  
36 17 predictor of suicidal behaviour, with this link remaining after controlling for age, gender, and  
37  
38 18 ethnicity [12, 17-18]. A systematic review of the limited empirical research on self-harm, including  
39  
40 19 suicidal self-harm and NSSI, in LMICs found that the prevalence of NSSI and suicide attempts in  
41  
42 20 LMICs was comparable to HICs, that the most common methods of NSSI in LMICs were hitting,  
43  
44 21 cutting, wound picking and biting and these findings were similar to evidence from HICs [16] Risk  
45  
46 22 factors identified for suicidal self-harm and NSSI in LMICs were often family related, for example  
47  
48 23 family conflict, divorced parents and childhood abuse, and protective factors were high family  
49  
50 24 functioning and understanding parents, which were attributed to greater reliance on family in LMICs  
51  
52 25 compared to many Western HICs [16].  
53  
54  
55  
56 26

57  
58 27 Suicide and self-harm in both LMICs and HICs are the result of complex interactions between  
59  
60 28 genetic, psychological, biological, cultural, sociodemographic and social factors [1, 19-20]. Although

1  
2  
3 1 the healthcare sector clearly has a vital role to play in tackling suicide and self-harm in LMICs, an  
4  
5 2 approach that brings together multiple sectors including education, labour, business, law, politics and  
6  
7 3 the media is crucial [1, 21]. The knowledge, attitudes and experiences stakeholders from various  
8  
9 4 sectors have of suicide and self-harm are likely to influence suicide and self-harm prevention and  
10  
11 5 intervention strategies. A recent review by the WHO [21] highlights that evaluations of the knowledge  
12  
13 6 and attitudes that priority groups, for example policy makers and community groups, not only  
14  
15 7 healthcare staff, have of mental health and suicidal behaviour are key to the collection of high quality  
16  
17 8 surveillance data and prevention strategies. Reviews to date have focused on the knowledge, attitudes  
18  
19 9 and experiences that healthcare professionals have towards self-harm and suicide [22-25]. The aim of  
20  
21 10 this systematic review is to examine various stakeholders' knowledge, attitudes and experiences of  
22  
23 11 self-harm and suicide. Therefore, in addition to stakeholders from the healthcare sector, other  
24  
25 12 stakeholders who will be included in this review are people who have experienced self-harm and/or  
26  
27 13 have attempted suicide themselves, and their relatives, friends, and co-workers, and stakeholders from  
28  
29 14 the social, healthcare, government, and criminal justice sectors. We are interested in exploring the  
30  
31 15 range of publications on the broad spectrum of knowledge, attitudes and experiences that these  
32  
33 16 various stakeholders may have concerning suicide and self-harm, including for example, knowledge  
34  
35 17 stakeholders may have on prevalence and risk and protective factors for suicide and self-harm,  
36  
37 18 stigmatising or empathetic attitudes towards those who self-harm, and experiences such as providing  
38  
39 19 or receiving medical treatment for self-harm. This systematic review is being undertaken as part of the  
40  
41 20 South Asia Self Harm Initiative (SASHI) project, which aims to help to find effective responses to  
42  
43 21 self-harm and suicide in South Asia by building capability and capacity in research infrastructure and  
44  
45 22 expertise in the region. Findings from this systematic review will be used to inform the development  
46  
47 23 of a survey on knowledge, attitudes and well-being in South Asia. Thus, we are particularly interested  
48  
49 24 in studies conducted in South Asia and countries with comparable healthcare systems or cultural  
50  
51 25 backgrounds.

## 52 53 54 55 56 57 58 **Research question** 59 60

1  
2  
3 1 The SPICE (Setting, Perspective, phenomena of Interest, Comparison, Evaluation) framework was  
4  
5 2 used to generate the research question that will be addressed by this systematic review [26]:  
6  
7

- 8 3 • What are stakeholders' knowledge, attitudes and experiences of self-harm and suicide in  
9  
10 4 LMICs?  
11  
12  
13 5

## 15 6 **METHODS AND ANALYSIS**

17 7 This protocol conforms to the Preferred Reporting Items for Systematic Reviews and Meta-Analyses  
18  
19 8 Protocols (PRISMA-P) checklist (see Supplementary File 1) [27]. We will conform to the PRISMA  
20  
21 9 statement and to the Cochrane systematic review literature guidelines when reporting the results [28-  
22  
23 10 29]. This systematic review has been registered on PROSPERO [30].  
24  
25  
26 11

### 27 12 **Search strategy**

29 13 A Betsi Cadwaladr University Health Board (BCUHB) librarian with expertise in systematic reviews  
30  
31 14 has assisted the authors in the development of the search strategy (see Appendix 1). We will search  
32  
33 15 Medline, Embase, PsycInfo, CINAHL, BNI, Social Sciences and Cochrane library. We will not apply  
34  
35 16 any language restrictions to the search criteria. EndNote and Microsoft Word will be used to manage  
36  
37 17 initial search results, screening and data throughout the review. We will update the searches prior to  
38  
39 18 publication to ensure the latest papers are included. Reference lists from included studies and any  
40  
41 19 identified systematic or literature reviews will also be searched by hand. Study authors will be  
42  
43 20 contacted in instances when it has not been possible to retrieve full text articles and when clarification  
44  
45 21 regarding inclusion criteria e.g. participant age, is required.  
46  
47  
48  
49 22

### 51 23 **Study selection criteria**

53 24 Inclusion criteria are empirical studies conducted in LMICs, as defined by the Organisation for  
54  
55 25 Economic Co-operation and Development [31], irrespective of the study design, whose focus is on the  
56  
57 26 knowledge, attitudes or experiences of stakeholders towards self-harm and/or suicide, where  
58  
59 27 participants are aged 16 years and above. Studies that include stakeholders' knowledge, attitudes and  
60

1 experiences of suicide and self-harm related to those under 16 will be included. Stakeholders are  
2 people who have experienced self-harm and/or have attempted suicide themselves, relatives, friends,  
3 co-workers, and healthcare workers of those who have self-harmed, attempted or completed suicide  
4 and people in the social, healthcare, government, and criminal justice sectors. Exclusion criteria are  
5 studies conducted in high income countries (HICs) and studies whose participants are not aged 16  
6 years and above. Studies whose main focus is on the prevalence and/or predictors of self-harm and/or  
7 suicide, relationships between state and/or trait characteristics and self-harm and/or suicide,  
8 euthanasia, terrorism, or epidemiology will also be excluded. Systematic and literature reviews will be  
9 consulted for relevant references but will not be included in the review. Opinion pieces, editorials,  
10 book reviews, and conference and poster abstracts will not be included in the review.

11  
12 The selection of studies for inclusion will adhere to the Cochrane guidelines and the process of  
13 selection of eligible studies will be illustrated via a PRISMA diagram [29]. Following deduplication  
14 of search results in EndNote, the following screening process will be undertaken in order to select  
15 studies for inclusion in the systematic review:

16  
17 1) Titles and abstracts will be read by two reviewers independently, and relevance and fit with  
18 the inclusion criteria will be assessed. Those of no obvious relevance will be excluded and  
19 any disagreements will be resolved with a third reviewer (and the wider expert group if  
20 necessary).

21  
22 2) Full text articles of remaining studies will be retrieved and read by two reviewers  
23 independently to assess their suitability for inclusion in the final review, disagreements will  
24 be resolved by discussion with a third reviewer (and the wider expert group if necessary).  
25 Both reviewers will populate a piloted pro-forma for each full text paper read (see Appendix  
26 2).

27

## 1 **Data extraction**

2 Data will be extracted from selected studies by one reviewer, and a second reviewer will check for  
3 accuracy. Extracted data will be recorded on a piloted pro-forma (see Appendix 2), and will reflect the  
4 inclusion criteria and the designated aims of the review, derived from the article as a whole.  
5 Discrepancies will be resolved through discussion (with the wider expert group if necessary).  
6 Additional data will be requested from study authors when necessary. Data extraction of qualitative  
7 studies (and for qualitative components in studies with mixed methods) will adhere to the same  
8 methods and will be reviewed independently.

## 9 **Outcomes**

10 Outcomes of interest include:

- 11 • The identification of relevant information on stakeholders' knowledge, attitudes and  
12 experiences of self-harm and suicide, particularly in South Asia and in countries with  
13 comparable healthcare systems and cultural backgrounds
- 14 • The quantitative methods and measures that have been used to investigate stakeholders'  
15 attitudes towards and knowledge about self-harm and suicide and their psychometric  
16 properties
- 17 • The qualitative methods that have been used to investigate stakeholders' attitudes towards,  
18 knowledge about, and experiences of self-harm and suicide.

19 The identified outcomes will inform the development of a survey on knowledge, attitudes and well-  
20 being in South Asia as part of the SASHI project.

## 21 **Quality assessment**

22 All eligible studies will be subject to quality appraisal. The quality of included quantitative studies  
23 will be appraised using the STROBE checklist [32]. The STROBE Statement consists of a checklist of  
24 22 items, which relate to the title, abstract, introduction, methods, results and discussion sections of  
25 articles. Eighteen items are common to cohort studies, case-control studies and cross-sectional studies  
26  
27

1 and four are specific to each of the three study designs. The quality of included qualitative studies will  
2 be appraised using the CASP checklist [33]. The 10-item CASP tool was considered to be the most  
3 suitable tool to consider the quality parameters of qualitative work, and is a well-validated and  
4 accepted tool [28]. Both the STROBE and CASP checklists will be applied independently by two  
5 reviewers and any disagreements will be resolved with a third reviewer (and the wider expert group if  
6 necessary).

7  
8 Studies will not be excluded on the basis of poor quality alone, rather all studies that meet the  
9 inclusion criteria will be included in the review. This low threshold for inclusion will be applied so  
10 that the review can benefit from researcher insight and theoretical as well as empirical contributions.

11 The relative quality of included studies will be critically considered and discussed in the review.

### 12 13 **Descriptive analysis and data synthesis**

14 We anticipate that the quantitative studies included in the review will be heterogenous and this will  
15 prevent meta-analysis. We will provide a narrative synthesis of quantitative studies, structured around  
16 population characteristics and the geographical region of studies. We will provide summaries of the  
17 quantitative methods and measures used to investigate stakeholders' attitudes towards and knowledge  
18 about self-harm and suicide and their psychometric properties.

19  
20 Meta-ethnography will be used to synthesise qualitative studies [34]. Initially reciprocal translation  
21 will be performed by comparing the concepts presented in different studies. A chronological approach  
22 will be taken to reciprocal translation; studies will be arranged chronologically, concepts from papers  
23 one and two will be compared, and the synthesis of papers one and two will then be compared with  
24 paper three, and so forth, as is described elsewhere [35]. When contradictions between studies are  
25 identified, we will perform refutational synthesis by exploring and explaining these. A 'lines-of-  
26 argument' synthesis, that links and explains concepts presented by different studies, will be conducted  
27 so that an interpretation of all included studies can be presented.



1  
2  
3 1 Two reviewers will lead data synthesis. Emergent analysis, and any discrepancies, will be discussed  
4  
5 2 with other members of the review team. Microsoft Office software will be used to facilitate data  
6  
7 3 synthesis.  
8  
9 4

#### 11 **Patient and public involvement**

12  
13 6 No patients or members of the public were involved in the design of this study.  
14  
15  
16 7

#### 18 **Amendments**

19  
20 9 An amendment has been made to the initial registration of this systematic review in PROSPERO,  
21  
22 10 which originally stated that studies from both HICs and LMICs would be included in the review. The  
23  
24 11 PROSPERO record was amended to state that only studies from LMICs will be included in this  
25  
26 12 review, and studies from HICs will be excluded from this review. Any further amendments to this  
27  
28 13 protocol will be documented in the full review.  
29  
30  
31 14

#### 32 **ETHICS AND DISSEMINATION**

33  
34 16 Ethics approval is not required as this is a protocol for the systematic review of previously published  
35  
36 17 data. In addition to a report to the funding body, we intend to submit the systematic review for  
37  
38 18 publication in a high-impact, peer-reviewed journal. We will select an open access journal to ensure  
39  
40 19 free access to undergraduate and graduate students, researchers, academics and research groups.  
41  
42 20

43 20 Results will also be disseminated at conferences seminars, congresses and symposia and to relevant  
44  
45 21 stakeholders.  
46  
47 22

48  
49 23 **Acknowledgements:** The authors would like to thank Mrs Nia Morris (NM) from BCUHB library for  
50  
51 24 her contribution to the development of the search strategy.  
52  
53 25

54  
55 26 **Contributions:** CR, RM, PH, AK, MK conceived the research idea. SN led the development of the  
56  
57 27 search strategy, with input from NM, RM, AK, PH. RM, SN, MK, AK, PH, CR conceived the  
58  
59  
60

1 manuscript. RM lead the drafting of the manuscript with contributions from SN, AE, SB, MK, AK,  
2 PH, NC, CR. All authors approved the final manuscript.

3  
4 **Funding:** This manuscript was funded by UK Research and Innovation Global Challenge Research  
5 Fund (ref: MR/P028144/1). The funder did not have any role in developing this protocol.

6  
7 **Competing interests:** None declared

## 8 9 **References**

- 10 [1] World Health Organization. Preventing suicide: a global imperative. World Health Organization,  
11 2014. Available:  
12 [https://apps.who.int/iris/bitstream/handle/10665/131056/9789241564779\\_eng.pdf;jsessionid=](https://apps.who.int/iris/bitstream/handle/10665/131056/9789241564779_eng.pdf;jsessionid=F6255CAAD6496DA078DE41FAB0C5CCBF?sequence=1)  
13 [F6255CAAD6496DA078DE41FAB0C5CCBF?sequence=1](https://apps.who.int/iris/bitstream/handle/10665/131056/9789241564779_eng.pdf;jsessionid=F6255CAAD6496DA078DE41FAB0C5CCBF?sequence=1) . [Accessed 04 May 2020].
- 14  
15 [2] Jordans MJD, Kaufman A, Brenman NF, *et al.* Suicide in South Asia: a scoping review. *BMC*  
16 *Psychiatry* 2014;**14**:358.doi:10.1186/s12888-014-0358-9 pmid:  
17 <https://www.ncbi.nlm.nih.gov/pubmed/25539951>
- 18  
19 [3] United Nations. Department of economic and social affairs sustainable development: Ensure  
20 healthy lives and promote well-being for all at all ages. United Nations, 2015. Available:  
21 <https://sdgs.un.org/goals/goal3> [Accessed 20 December 2020]
- 22  
23 [4] Ward E, McCartney T, Arscott-Mills S, *et al.* The Jamaica injury surveillance system: a profile of  
24 the intentional and unintentional injuries in Jamaican hospitals. *West Indian Med J* 2010;**59**:7-  
25 13. pmid: <https://www.ncbi.nlm.nih.gov/pubmed/20931906>

- 1  
2  
3 1 [5] World Health Organization. Suicide in the World: global health estimates. World Health  
4  
5 2 Organization, 2019. Available: <https://www.who.int/publications/i/item/suicide-in-the-world>  
6  
7 3 [Accessed 20 December 2020]  
8  
9 4  
10  
11 5 [6] Aggarwal S. Suicide in India. *Br Med Bull* 2015;**114**:127-134.doi:10.1093/bmb/ldv018 pmid:  
12  
13 <https://www.ncbi.nlm.nih.gov/pubmed/25958380>  
14  
15 6  
16 7  
17  
18 8 [7] Gururaj G, Isaac MK, Subbakrishna DK, *et al*. Risk factors for completed suicides: a case-control  
19  
20 9 study from Bangalore, India. *Inj Control Saf Promot* 2004;**3**:183-  
21  
22 10 191.doi:10.1080/156609704/233/289706 pmid: [https://www.ncbi.nlm.nih.gov/pubmed/](https://www.ncbi.nlm.nih.gov/pubmed/15764105)  
23  
24 11 15764105  
25  
26 12  
27  
28 13 [8] Laloe V. Patterns of deliberate self-burning in various parts of the world: a review. *Burns*  
29  
30 14 2004;**30**:207-215.doi:10.1016/j.burns.2003.10.018 pmid:  
31  
32 15 <https://www.ncbi.nlm.nih.gov/pubmed/15082345>  
33  
34 16  
35  
36 17 [9] Vijayakumar L. Suicide in women. *Indian J Psychiatry* 2015;**57**:S233-S238.doi:10.4103/0019-  
37  
38 18 5545.161484 pmid: <https://www.ncbi.nlm.nih.gov/pubmed/26330640>  
39  
40 19  
41  
42  
43 20 [10] Jacobson CM, Gould M. The epidemiology and phenomenology of non-suicidal self-injurious  
44  
45 21 behavior among adolescents: a critical review of the literature. *Arch Suicide Res* 2007;**11**:12-  
46  
47 22 47doi:10.1080/13811110701247602 pmid: <https://www.ncbi.nlm.nih.gov/pubmed/17453692>  
48  
49 23  
50  
51 24 [11] Muehlenkamp JJ. Self-injurious behavior as a separate clinical syndrome. *Am J Orthopsychiatry*  
52  
53 25 2005;**75**:324-333.doi:10.1037/0002-9432.75.2.324 pmid:  
54  
55 26 <https://www.ncbi.nlm.nih.gov/pubmed/15839768>  
56  
57  
58  
59 27  
60

- 1  
2  
3 [12] Nock MK. Self-injury. *Annu Rev Clin Psychol* 2010;**6**:339-363  
4  
5 doi:10.1146/annurev.clinpsy.121208.131258. pmid:  
6  
7 <https://www.ncbi.nlm.nih.gov/pubmed/20192787>  
8  
9  
10  
11 [13] Walsh BW. *Treating self-injury: A practical guide* . New York, USA: Guilford Press 2005  
12  
13  
14  
15 [14] Gholamrezaei M, Stefano JD, Heath NL. Nonsuicidal self-injury across cultures and ethnic and  
16  
17 racial minorities: a review. *Int J Psychol* 2017;**52**:316-326. doi:10.1002/ijop.12230 pmid:  
18  
19 <https://www.ncbi.nlm.nih.gov/pubmed/26644040>  
20  
21  
22  
23  
24 [15] Aggerwal S, Berk M. Nonsuicidal self-injury in Indian adolescents: nonexistent or  
25  
26 unacknowledged? *Int J Soc Psychiatry* 2015;**61**:516-517doi:10.1177/0020764015579739  
27  
28 pmid: <https://www.ncbi.nlm.nih.gov/pubmed/26209701>  
29  
30  
31  
32  
33 [16] Aggarwal S, Patton G, Reavley N. Youth self-harm in low- and middle- income countries:  
34  
35 systematic review of the risk and protective factors. *Int J Soc Psychiatry* 2017;**63**:359-375doi:  
36  
37 10.1177/0020764017700175 pmid: <https://www.ncbi.nlm.nih.gov/pubmed/28351292>  
38  
39  
40  
41 [17] Hamza CA, Stewart SL, Willoughby T. Examining the link between nonsuicidal self-injury and  
42  
43 suicidal behaviour: a review of the literature and integrated model. *Clin Psychol Rev* 2012;**6**  
44  
45 482-95.doi:10.1016/j.cpr.2012.05.003. pmid:  
46  
47 <https://www.ncbi.nlm.nih.gov/pubmed/22717336>  
48  
49  
50  
51  
52 [18] Owens D, Horrocks J, House A. Fatal and non-fatal repetition of self-harm: systematic review.  
53  
54 *Br J Psychiatry* 2002;**181**:193-99. doi: 10.1192/bjp.181.3.193 pmid:  
55  
56 <https://www.ncbi.nlm.nih.gov/pubmed/12204922>  
57  
58  
59  
60

- 1  
2  
3 1 [19] Hawton K, Sanders KEA, O'Connor RC. Self-harm and suicide in adolescents. *Lancet*  
4  
5 2 2012;**379**:2373-82. doi: 10.1016/S0140-6736(12)60322-5 pmid:  
6  
7 3 <https://www.ncbi.nlm.nih.gov/pubmed/22726518>  
8  
9 4  
10  
11 5 [20] Yip PSF, Caine E, Yousef S, *et al.* Means restriction for suicide prevention. *Lancet*  
12  
13 6 2012;**379**:2393-2399. doi: 10.1016/S0140-6736(12)60521-2  
14  
15 7  
16  
17 8 [21] World Health Organization. National suicide prevention strategies: progress, examples and  
18  
19 9 indicators. World Health Organization, 2018. Available:  
20  
21 10 <https://apps.who.int/iris/bitstream/handle/10665/279765/9789241515016-eng.pdf?ua=1> .  
22  
23 11 [accessed 04 May 2020].  
24  
25 12  
26  
27 13 [22] Karman P, Kool N, Poslawsky IE, *et al.* Nurses' attitudes towards self-harm: a literature review.  
28  
29 14 *J Psychiatr Ment Health Nurs* 2015;**22**:65-75. doi: 10.1111/jpm.12171 pmid:  
30  
31 15 <https://www.ncbi.nlm.nih.gov/pubmed/25490929>  
32  
33 16  
34  
35 17 [23] O'Connor S, Glover L. Hospital staff experiences of their relationships with adults who self-  
36  
37 18 harm: a meta-synthesis. *Psychol Psychother* 2017;**90**:480-501. doi: 10.1111/papt.12113.  
38  
39 19 pmid: <https://www.ncbi.nlm.nih.gov/pubmed/28035740>  
40  
41 20  
42  
43 21 [24] Rees N, Rapport F, Thomas G, *et al.* Perceptions of paramedic and emergency care workers of  
44  
45 22 those who self-harm: a systematic review of the quantitative literature. *J Psychosom Res*  
46  
47 23 2014;**77**:449-456. doi: 10.1016/j.jpsychores.2014.09.006. pmid:  
48  
49 24 <https://www.ncbi.nlm.nih.gov/pubmed/25263398>  
50  
51 25  
52  
53 26 [25] Saunders KEA, Hawton K, Fortune S, *et al.* Attitudes and knowledge of clinical staff regarding  
54  
55 27 people who self-harm: a systematic review. *J Affect Disord* 2012;**139**:205-216. doi:  
56  
57 28 10.1016/j.jad.2011.08.024 pmid: <https://www.ncbi.nlm.nih.gov/pubmed/21925740>  
58  
59  
60

- 1  
2  
3 1  
4  
5 2 [26] Booth A. Clear and present questions: formulating questions for evidence based practice. *Library*  
6  
7 3 *Hi Tech* 2006;**24**:355-368. doi: 10.1108/07378830610692127  
8  
9 4  
10  
11 5 [27] Shamseer L, Moher D, Clarke M, *et al.* Preferred reporting items for systematic review and meta-  
12  
13 analysis protocols (PRISMA-P) 2015: elaboration and explanation. *BMJ* 2015;**350**:g7647.  
14 6  
15 doi: 10.1136/bmj.g7647 pmid: <https://www.ncbi.nlm.nih.gov/pubmed/25555855>  
16 7  
17 8  
18  
19 9 [28] Higgins JPT, Green S (editors). Cochrane handbook for systematic reviews of interventions  
20  
21 Version 6. The Cochrane Collaboration, 2019. Available: <http://handbook.cochrane.org>.  
22 10  
23 [Accessed 04 May 2020].  
24 11  
25  
26 12  
27  
28 13 [29] Liberati A, Altman DG, Tetzlaff J, *et al.* The PRISAM statement for reporting systematic  
29  
30 reviews and meta-analyses of studies that evaluate healthcare interventions: explanation and  
31 14  
32 elaboration. *BMJ* 2009;**339**:b2700. doi: 10.1136/bmj.b2700 pmid:  
33 15  
34 <https://www.ncbi.nlm.nih.gov/pubmed/19622552>  
35 16  
36 17  
37  
38 18 [30] McPhillips R, Nafees S, Krishna M, *et al.* Knowledge, attitudes, and experiences of self-harm  
39  
40 and suicide in low and middle income countries: a systematic review. PROSPERO 2019  
41 19  
42 CRD42019135323. Available:  
43 20  
44 [https://www.crd.york.ac.uk/prospere/display\\_record.php?ID=CRD42019135323](https://www.crd.york.ac.uk/prospere/display_record.php?ID=CRD42019135323) [Accessed  
45 21  
46 04 May 2020]  
47 22  
48  
49 23  
50  
51 24 [31] Organisation for Economic Co-operation and Development. DAC List of ODA recipients for  
52  
53 reporting on aid in 2018 and 2019. Organisation for Economic Co-operation and  
54 25  
55 Development, 2019. Available: [http://www.oecd.org/dac/financing-sustainable-](http://www.oecd.org/dac/financing-sustainable-development/development-finance-standards/dac-list.htm)  
56 26  
57 [development/development-finance-standards/dac-list.htm](http://www.oecd.org/dac/financing-sustainable-development/development-finance-standards/dac-list.htm) [Accessed 04 May 2020]  
58 27  
59  
60 28

1  
2  
3  
4  
5  
6  
7  
8  
9  
10  
11  
12  
13  
14  
15  
16  
17  
18  
19  
20  
21  
22  
23  
24  
25  
26  
27  
28  
29  
30  
31  
32  
33  
34  
35  
36  
37  
38  
39  
40  
41  
42  
43  
44  
45  
46  
47  
48  
49  
50  
51  
52  
53  
54  
55  
56  
57  
58  
59  
60

1 [32] von Elm E, Altman DG, Egger M, *et al.* STROBE Initiative. The strengthening the reporting in  
2 observational studies in epidemiology (STROBE) statement guidelines for reporting  
3 observational studies. *Lancet* 2007;**370**:1453-57 doi: 0.1016/S0140-6736(07)61602-X pmid:  
4 <https://www.ncbi.nlm.nih.gov/pubmed/18064739>

6 [33] Critical Appraisal Skills Programme. CASP qualitative checklist. Critical Appraisal Skills  
7 Programme , 2018. Available: <https://casp-uk.net/wp-content/uploads/2018/01/CASP->  
8 [Qualitative-Checklist-2018.pdf](https://casp-uk.net/wp-content/uploads/2018/01/CASP-)  
9 [Accessed: 04 May 2020]

11 [34] Noblit GW, Hare RD. *Meta-ethnography: synthesising qualitative studies.* Sage Publications.

13 [35] Atkins S, Lewin S, Smith H *et al.* Conducting a meta-ethnography of qualitative literature:  
14 lessons learnt. *BMC Med Res Methodol* 2008;**8**:21. doi: 10.1186/1471-2288-8-21 pmid:  
15 <https://www.ncbi.nlm.nih.gov/pubmed/18416812>

1  
2  
3  
4  
5  
6  
7  
8  
9  
10  
11  
12  
13  
14  
15  
16  
17  
18  
19  
20  
21  
22  
23  
24  
25  
26  
27  
28  
29  
30  
31  
32  
33  
34  
35  
36  
37  
38  
39  
40  
41  
42  
43  
44  
45  
46  
47  
48  
49  
50  
51  
52  
53  
54  
55  
56  
57  
58  
59  
60

For peer review only



**Supplementary file 1: PRISMA-P (Preferred Reporting Items for Systematic review and Meta-Analysis Protocols) 2015 checklist: recommended items to address in a systematic review protocol\***

| Section and topic                 | Item No | Checklist item                                                                                                                                                                                  | Complete |
|-----------------------------------|---------|-------------------------------------------------------------------------------------------------------------------------------------------------------------------------------------------------|----------|
| <b>ADMINISTRATIVE INFORMATION</b> |         |                                                                                                                                                                                                 |          |
| Title:                            |         |                                                                                                                                                                                                 |          |
| Identification                    | 1a      | Identify the report as a protocol of a systematic review                                                                                                                                        | X        |
| Update                            | 1b      | If the protocol is for an update of a previous systematic review, identify as such                                                                                                              | N/A      |
| Registration                      | 2       | If registered, provide the name of the registry (such as PROSPERO) and registration number                                                                                                      | X        |
| Authors:                          |         |                                                                                                                                                                                                 |          |
| Contact                           | 3a      | Provide name, institutional affiliation, e-mail address of all protocol authors; provide physical mailing address of corresponding author                                                       | X        |
| Contributions                     | 3b      | Describe contributions of protocol authors and identify the guarantor of the review                                                                                                             | X        |
| Amendments                        | 4       | If the protocol represents an amendment of a previously completed or published protocol, identify as such and list changes; otherwise, state plan for documenting important protocol amendments | X        |
| Support:                          |         |                                                                                                                                                                                                 |          |
| Sources                           | 5a      | Indicate sources of financial or other support for the review                                                                                                                                   | X        |
| Sponsor                           | 5b      | Provide name for the review funder and/or sponsor                                                                                                                                               | X        |
| Role of sponsor or funder         | 5c      | Describe roles of funder(s), sponsor(s), and/or institution(s), if any, in developing the protocol                                                                                              | X        |
| <b>INTRODUCTION</b>               |         |                                                                                                                                                                                                 |          |
| Rationale                         | 6       | Describe the rationale for the review in the context of what is already known                                                                                                                   | X        |
| Objectives                        | 7       | Provide an explicit statement of the question(s) the review will address with reference to participants, interventions, comparators, and outcomes (PICO)                                        | X        |
| <b>METHODS</b>                    |         |                                                                                                                                                                                                 |          |
| Eligibility criteria              | 8       | Specify the study characteristics (such as PICO, study design, setting, time frame) and report characteristics (such as years considered, language, publication                                 | X        |

|                                    |     |                                                                                                                                                                                                                                                  |     |
|------------------------------------|-----|--------------------------------------------------------------------------------------------------------------------------------------------------------------------------------------------------------------------------------------------------|-----|
|                                    |     | status) to be used as criteria for eligibility for the review                                                                                                                                                                                    |     |
| Information sources                | 9   | Describe all intended information sources (such as electronic databases, contact with study authors, trial registers or other grey literature sources) with planned dates of coverage                                                            | X   |
| Search strategy                    | 10  | Present draft of search strategy to be used for at least one electronic database, including planned limits, such that it could be repeated                                                                                                       | X   |
| Study records:                     |     |                                                                                                                                                                                                                                                  |     |
| Data management                    | 11a | Describe the mechanism(s) that will be used to manage records and data throughout the review                                                                                                                                                     | X   |
| Selection process                  | 11b | State the process that will be used for selecting studies (such as two independent reviewers) through each phase of the review (that is, screening, eligibility and inclusion in meta-analysis)                                                  | X   |
| Data collection process            | 11c | Describe planned method of extracting data from reports (such as piloting forms, done independently, in duplicate), any processes for obtaining and confirming data from investigator                                                            | X   |
| Data items                         | 12  | List and define all variables for which data will be sought (such as PICO items, funding sources), any pre-planned data assumptions and simplifications                                                                                          | X   |
| Outcomes and prioritization        | 13  | List and define all outcomes for which data will be sought, including prioritization of main and additional outcomes, with rationale                                                                                                             | X   |
| Risk of bias in individual studies | 14  | Describe anticipated methods for assessing risk of bias of individual studies, including whether this will be done at the outcome or study level, or both; state how this information will be used in data synthesis                             | X   |
| Data synthesis                     | 15a | Describe criteria under which study data will be quantitatively synthesised                                                                                                                                                                      | X   |
|                                    | 15b | If data are appropriate for quantitative synthesis, describe planned summary measures, methods of handling data and methods of combining data from studies, including any planned exploration of consistency (such as $I^2$ , Kendall's $\tau$ ) | N/A |
|                                    | 15c | Describe any proposed additional analyses (such as sensitivity or subgroup analyses, meta-regression)                                                                                                                                            | X   |
|                                    | 15d | If quantitative synthesis is not appropriate, describe the type of summary planned                                                                                                                                                               | X   |
| Meta-bias(es)                      | 16  | Specify any planned assessment of meta-bias(es) (such as publication bias across studies, selective reporting within studies)                                                                                                                    | N/A |
| Confidence in cumulative evidence  | 17  | Describe how the strength of the body of evidence will be assessed (such as GRADE)                                                                                                                                                               | N/A |

1  
2  
3  
4  
5  
6  
7  
8  
9  
10  
11  
12  
13  
14  
15  
16  
17  
18  
19  
20  
21  
22  
23  
24  
25  
26  
27  
28  
29  
30  
31  
32  
33  
34  
35  
36  
37  
38  
39  
40  
41  
42  
43  
44  
45  
46

**\* It is strongly recommended that this checklist be read in conjunction with the PRISMA-P Explanation and Elaboration (cite when available) for important clarification on the items. Amendments to a review protocol should be tracked and dated. The copyright for PRISMA-P (including checklist) is held by the PRISMA-P Group and is distributed under a Creative Commons Attribution Licence 4.0.**

*From: Shamseer L, Moher D, Clarke M, Ghersi D, Liberati A, Petticrew M, Shekelle P, Stewart L, PRISMA-P Group. Preferred reporting items for systematic review and meta-analysis protocols (PRISMA-P) 2015: elaboration and explanation. BMJ. 2015 Jan 2;349(jan02 1):g7647.*

For peer review only

**Appendix 1: Knowledge, attitudes, and experiences of self-harm and suicide in low and middle income countries: Medline search strategy**

**Self-harm and suicide terms**

- 1 Suicide/
- 2 Suicide.mp
- 3 Suicide, Attempted/
- 4 Suicide, Attempted.mp
- 5 Self-Injurious Behavior/
- 6 Self-Injurious Behavior.mp
- 7 Self-Mutilation/
- 8 Self-Mutilation.mp
- 9 Suicidal Ideation/
- 10 Suicidal Ideation.mp
- 11 Attempted Suicide/
- 12 Attempted Suicide.mp
- 13 Drug Overdose/
- 14 Drug Overdose.mp
- 15 ((Self adj2 cut\$) or (para adj suicid\$) or (attempt\$ adj suicide\$) or (suicid\$ adj behavio\$)).mp.
- 16 (auto?mutilat\$ or cutt\$ or over?dos\$ or self?destruct\$ or self?harm\$ or self?immolat\$ or self?inflict\$ or self?injur\$ or self?mutilat\$ or self?poison\$ or suicide\$ or self?burn\$).mp.
- 17 Or/1-16

**Stakeholder terms**

- 18 exp Health Personnel/
- 19 Health Personnel.mp
- 20 exp PHYSICIANS/
- 21 PHYSICIANS.mp
- 22 exp Personnel, Hospital/
- 23 Personnel, Hospital.mp
- 24 Social Workers/
- 25 Social Workers.mp
- 26 ((doctor\$ or physician\$ or hosp\$ or medic\$ or health?care or social or wel?fare) adj (profession\$ or staff\$ or officer\$ or person\$ or worker\$)).mp
- 27 Family/
- 28 Famil\$.mp
- 29 Friends/
- 30 Friend\$.mp
- 31 Caregivers/
- 32 Caregiver\$.mp
- 33 Criminals/
- 34 Criminal\$.mp
- 35 Prisoners/
- 36 Prison\$.mp
- 37 Social Justice/
- 38 Soci\$ adj Just\$.mp
- 39 (partner\$ or parent\$ or grandparent\$ or children or sibling\$ or famil\$ or friend\$ or relative\$).mp.
- 40 (communit\$ or societ\$ or government\$).mp.
- 41 (criminal\$ or offender\$ or prisoner\$ or in?mate\$).mp.
- 42 (justice adj system\$).mp.

1  
2  
3 **43** or/18-42

4 **Knowledge and attitude terms**

5 **44** Attitude/

6 **45** Attitude of Health Personnel/

7 **46** Attitude to Death/

8 **47** Knowledge/

9 **48** Health Knowledge, Attitudes, Practice/

10 **49** Awareness/

11 **50** Education/

12 **51** Health Education/

13 **52** ((train\$ or trainer\$ or experienc\$ or perspectiv\$ or knowledg\$ or attitud\$ or awaren\$ or  
14 educat\$) adj health).mp.

15 **53** social behavior/ or help-seeking behavior/ or self-control/ or shyness/ or social  
16 adjustment/ or social isolation/ or social marginalization/ or social skills/ or social  
17 stigma/ or social exclusion/ or social inclusion

18 **54** Prejudice/

19 **55** Taboo/

20 **56** exp Shame/

21 **57** (tabo\$ or sham\$ or stigma\$ or prejudice\$ or help?seek\$ behavior\$ or self?control\$ or  
22 shy\$ or (social adj adjust\$ or behavio\$ or isolate\$ or margin\$ or Stigm\$ or skil\$)).mp

23 **58** or/44-57

24 **LMIC terms**

25 **59** Developing Countries/

26 **60** "low and middle income countr\$".ab,ti.

27 **61** LMIC.mp.

28 **62** india/ or sikkim/ or pakistan/

29 **63** exp Asia/

30 **64** or/59-63

31 **Self-harm and suicide, stakeholders, knowledge and attitude and LMIC combined (with  
32 limits)**

33 **65** 17 and 43 and 58 and 64

34 **66** limit 65 to humans

35 **67** limit 66 (adolescent <13 to 17 years> or adult <18 to 64 years> or aged <65+ years>)  
36 (aged or "aged, 80 and over" or "frail elderly" or "middle aged" or "young adult" or  
37 adults or "teenager" or adolescent).mp  
38  
39  
40  
41  
42  
43  
44  
45  
46  
47  
48  
49  
50  
51  
52  
53  
54  
55  
56  
57  
58  
59  
60

## Appendix 2: Knowledge, attitudes, and experiences of self-harm and suicide in low and middle income countries systematic review: data extraction form

Notes for reviewers

Record any missing information as unclear or not described to ensure it is clear that the information was not found in the paper, not that you forgot to extract it

| General information                                                                                                              |                                                                                                                                                                                                                                                                                                                                                                                                                                                                                                                                                                                                                                                                                                                                        |                          |
|----------------------------------------------------------------------------------------------------------------------------------|----------------------------------------------------------------------------------------------------------------------------------------------------------------------------------------------------------------------------------------------------------------------------------------------------------------------------------------------------------------------------------------------------------------------------------------------------------------------------------------------------------------------------------------------------------------------------------------------------------------------------------------------------------------------------------------------------------------------------------------|--------------------------|
| Date form completed                                                                                                              |                                                                                                                                                                                                                                                                                                                                                                                                                                                                                                                                                                                                                                                                                                                                        |                          |
| Reviewer extracting data                                                                                                         |                                                                                                                                                                                                                                                                                                                                                                                                                                                                                                                                                                                                                                                                                                                                        |                          |
| Study title                                                                                                                      |                                                                                                                                                                                                                                                                                                                                                                                                                                                                                                                                                                                                                                                                                                                                        |                          |
| Study authors                                                                                                                    |                                                                                                                                                                                                                                                                                                                                                                                                                                                                                                                                                                                                                                                                                                                                        |                          |
| Journal                                                                                                                          |                                                                                                                                                                                                                                                                                                                                                                                                                                                                                                                                                                                                                                                                                                                                        |                          |
| Year of publication                                                                                                              |                                                                                                                                                                                                                                                                                                                                                                                                                                                                                                                                                                                                                                                                                                                                        |                          |
| Study author contact details                                                                                                     |                                                                                                                                                                                                                                                                                                                                                                                                                                                                                                                                                                                                                                                                                                                                        |                          |
| Notes                                                                                                                            |                                                                                                                                                                                                                                                                                                                                                                                                                                                                                                                                                                                                                                                                                                                                        |                          |
| Study eligibility for inclusion in review                                                                                        |                                                                                                                                                                                                                                                                                                                                                                                                                                                                                                                                                                                                                                                                                                                                        |                          |
| Main focus on stakeholders' knowledge, attitudes and experiences of self-harm and/or suicide (excluding euthanasia or terrorism) | Yes/No                                                                                                                                                                                                                                                                                                                                                                                                                                                                                                                                                                                                                                                                                                                                 | Location in text (pg. #) |
| Study population aged 16 and above (or can data from those aged 16 and above only can be extracted?)                             | Yes/No                                                                                                                                                                                                                                                                                                                                                                                                                                                                                                                                                                                                                                                                                                                                 | Location in text (pg. #) |
| Low-middle income country                                                                                                        | Yes/No                                                                                                                                                                                                                                                                                                                                                                                                                                                                                                                                                                                                                                                                                                                                 | Location in text (pg. #) |
| Include or exclude                                                                                                               | Include/Exclude                                                                                                                                                                                                                                                                                                                                                                                                                                                                                                                                                                                                                                                                                                                        |                          |
| Reason for exclusion                                                                                                             | Reasons for exclusion<br>1) Knowledge, attitudes and experience of self-harm/suicide not main concern of study (including terrorism and euthanasia) include main phenomenon being studied in notes – to be reviewed after 25 studies<br>1a) Completely irrelevant topic e.g. paper on depression, no mention of self-harm/suicide 1b) Focus on prevalence of suicide/self-harm 1c) Focus on risk factors of suicide/self-harm 1d) Focus on intervention only 1e) Mention of self-harm/suicide however topic not relevant to attitudes, knowledge and experiences of self-harm/suicide<br>2) Research not conducted in LMICs<br>3) Research population not 16 and over<br>4) Literature review<br>5) Commentary, book review, editorial |                          |
| Notes                                                                                                                            |                                                                                                                                                                                                                                                                                                                                                                                                                                                                                                                                                                                                                                                                                                                                        |                          |
| Characteristics of included studies: Participants                                                                                |                                                                                                                                                                                                                                                                                                                                                                                                                                                                                                                                                                                                                                                                                                                                        |                          |

|                                                                                                                                                                    | Description as stated in paper | Location in text (pg. #) |
|--------------------------------------------------------------------------------------------------------------------------------------------------------------------|--------------------------------|--------------------------|
| Study location (Country and state/city/area) e.g. India, Bangalore                                                                                                 |                                |                          |
| Study setting e.g. hospital, community                                                                                                                             |                                |                          |
| Study population e.g. nurses, community members                                                                                                                    |                                |                          |
| Informed consent obtained                                                                                                                                          | <i>Yes, No, Unclear</i>        |                          |
| Total number of participants                                                                                                                                       |                                |                          |
| Exclusions and withdrawals                                                                                                                                         |                                |                          |
| Participant demographics e.g.<br>Age<br>Sex<br>Race/Ethnicity<br>Religious beliefs<br>Mental illness diagnosis<br>Physical illness diagnosis<br>Other demographics |                                |                          |
| Notes                                                                                                                                                              |                                |                          |
| <b>Characteristics of included studies: Methods</b>                                                                                                                |                                |                          |
|                                                                                                                                                                    | Description as stated in paper | Location in text (pg. #) |
| Aim of study/Research question(s) (implicit or explicit in text?)                                                                                                  |                                |                          |
| Study methodology (or methodologies)                                                                                                                               |                                |                          |
| Quantitative measures used e.g. Acceptability of Suicide Scale and information on whether measure is validated (if applicable)                                     |                                |                          |
| Quantitative analysis methods and procedure                                                                                                                        |                                |                          |
| Qualitative methods used e.g. focus group, one-to-one interviews, vignettes (if applicable)                                                                        |                                |                          |
| Theoretical/epistemological perspectives underpinning qualitative research (explicit or reviewer's interpretation)                                                 |                                |                          |
| Qualitative data analysis methods and procedure                                                                                                                    |                                |                          |
| Start date and end date                                                                                                                                            |                                |                          |
| Notes                                                                                                                                                              |                                |                          |
| <b>Characteristics of included studies: Results</b>                                                                                                                |                                |                          |
|                                                                                                                                                                    | Description as stated in paper | Location in text (pg. #) |
| Qualitative results – direct quotes from participants (first order)                                                                                                |                                |                          |

|                                                                                          |                                |                                 |
|------------------------------------------------------------------------------------------|--------------------------------|---------------------------------|
| Qualitative results – study author’s interpretations of data (second order)              |                                |                                 |
| Quantitative results                                                                     |                                |                                 |
| Indicators of acceptability to users (if applicable)                                     |                                |                                 |
| Suggested mechanisms of intervention action (if applicable)                              |                                |                                 |
| <b>Characteristics of included studies: Other information</b>                            |                                |                                 |
|                                                                                          | Description as stated in paper | <i>Location in text (pg. #)</i> |
| Key conclusions of authors                                                               |                                |                                 |
| References to other relevant studies                                                     |                                |                                 |
| Correspondence required by reviewers for further information (who, when, what requested) |                                |                                 |
| Notes                                                                                    |                                |                                 |
