# Supplementary material for: Knowledge, attitudes and experiences of self-harm and suicide in low-income and middle-income countries: protocol for a systematic review
Source: PubMed Central journal article supplement (PMC8220466; doi:10.1136/bmjopen-2020-041645), 2021-06-22
Supplement: bmjopen-2020-041645supp002.pdf [file bmjopen-2020-041645supp002.pdf]

**Appendix 1: Knowledge, attitudes, and experiences of self-harm and suicide in low and middle income countries: Medline search strategy****Self-harm and suicide terms**

- 1 Suicide/
- 2 Suicide.mp
- 3 Suicide, Attempted/
- 4 Suicide, Attempted.mp
- 5 Self-Injurious Behavior/
- 6 Self-Injurious Behavior.mp
- 7 Self-Mutilation/
- 8 Self-Mutilation.mp
- 9 Suicidal Ideation/
- 10 Suicidal Ideation.mp
- 11 Attempted Suicide/
- 12 Attempted Suicide.mp
- 13 Drug Overdose/
- 14 Drug Overdose.mp
- 15 ((Self adj2 cut\$) or (para adj suicid\$) or (attempt\$ adj suicide\$) or (suicid\$ adj behavio\$)).mp.
- 16 (auto?mutilat\$ or cutt\$ or over?dos\$ or self?destruct\$ or self?harm\$ or self?immolat\$ or self?inflict\$ or self?injur\$ or self?mutilat\$ or self?poison\$ or suicide\$ or self?burn\$).mp.
- 17 Or/1-16

**Stakeholder terms**

- 18 exp Health Personnel/
- 19 Health Personnel.mp
- 20 exp PHYSICIANS/
- 21 PHYSICIANS.mp
- 22 exp Personnel, Hospital/
- 23 Personnel, Hospital.mp
- 24 Social Workers/
- 25 Social Workers.mp
- 26 ((doctor\$ or physician\$ or hosp\$ or medic\$ or health?care or social or wel?fare) adj (profession\$ or staff\$ or officer\$ or person\$ or worker\$)).mp
- 27 Family/
- 28 Famil\$.mp
- 29 Friends/
- 30 Friend\$.mp
- 31 Caregivers/
- 32 Caregiver\$.mp
- 33 Criminals/
- 34 Criminal\$.mp
- 35 Prisoners/
- 36 Prison\$.mp
- 37 Social Justice/
- 38 Soci\$ adj Just\$.mp
- 39 (partner\$ or parent\$ or grandparent\$ or children or sibling\$ or famil\$ or friend\$ or relative\$).mp.
- 40 (communit\$ or societ\$ or government\$).mp.
- 41 (criminal\$ or offender\$ or prisoner\$ or in?mate\$).mp.
- 42 (justice adj system\$).mp.

43 or/18-42

**Knowledge and attitude terms**

44 Attitude/

45 Attitude of Health Personnel/

46 Attitude to Death/

47 Knowledge/

48 Health Knowledge, Attitudes, Practice/

49 Awareness/

50 Education/

51 Health Education/

52 ((train\$ or trainer\$ or experienc\$ or perspectiv\$ or knowledg\$ or attitud\$ or awaren\$ or educat\$) adj health).mp.

53 social behavior/ or help-seeking behavior/ or self-control/ or shyness/ or social adjustment/ or social isolation/ or social marginalization/ or social skills/ or social stigma/ or social exclusion/ or social inclusion

54 Prejudice/

55 Taboo/

56 exp Shame/

57 (tabo\$ or sham\$ or stigma\$ or prejudice\$ or help?seek\$ behavior\$ or self?control\$ or shy\$ or (social adj adjust\$ or behavio\$ or isolate\$ or margin\$ or Stigm\$ or skil\$)).mp

58 or/44-57

**LMIC terms**

59 Developing Countries/

60 "low and middle income countr\$".ab,ti.

61 LMIC.mp.

62 india/ or sikkim/ or pakistan/

63 exp Asia/

64 or/59-63

**Self-harm and suicide, stakeholders, knowledge and attitude and LMIC combined (with limits)**

65 17 and 43 and 58 and 64

66 limit 65 to humans

67 limit 66 (adolescent <13 to 17 years> or adult <18 to 64 years> or aged <65+ years>) (aged or "aged, 80 and over" or "frail elderly" or "middle aged" or "young adult" or adults or "teenager" or adolescent).mp
